# Supplementary material for: Single-cell spatial transcriptomics of fixed, paraffin-embedded biopsies reveals colitis-associated cell networks
Source: PubMed Central journal article supplement — bioRxiv. 2024 Nov 11:2024.11.11.623014. Preprint. [Version 1] doi: 10.1101/2024.11.11.623014 (PMC11601222; doi:10.1101/2024.11.11.623014), 2024-11-11
Supplement: NIHPP2024.11.11.623014v1-supplement-1.pdf [file NIHPP2024.11.11.623014v1-supplement-1.pdf]

**Supplemental Fig. 1| MERSCOPE dataset analysis.** (A,B) UMAP visualization of MERSCOPE dataset (212 cells), highlighting (A) transcript count per cell, (B) number of genes per cell, and (C) area of TMA scanned showing DAPI and detected transcripts (D) spatial scatter plot depicting the spatial location of cells in the MERSCOPE dataset in relation to the TMA slide, colored based on leiden clustering.

**Supplemental Fig. 2| Xenium and CosMx dataset quality control and cell segmentation-related metrics.**

(A) Bar plot comparing the percentage of nuclear versus non-nuclear transcripts within the Xenium and CosMx datasets. (B) Cell area plotted in  $\mu\text{m}^2$  for each cell within the Xenium and CosMx dataset. (C) Representative Xenium cell segmentation visualization, displaying DAPI nuclei (white), nuclei outlines (red), cell borders (black), cells are pseudocolored by Xenium fine annotation labels. (D) Scatter plot of average transcript count per cell for genes specific to either the Xenium or CosMx (blue for Xenium, and orange for CosMx). (E,F) Number of (E) transcripts and (F) unique features detected per cell per Core or FOV within the Xenium and CosMx datasets, calculated using the complete gene panel for each platform (Xenium, 290 genes; CosMx, 1,000 genes; left) and limited to the 159 overlapping genes across both panels (right). Plotted points are categorized based on the age of FFPE blocks from which they originated. For panels B, E, and F, box and whisker plots, the band indicates the median, the box indicates the first and third quartiles, and the whiskers indicate minimum and maximum value within the upper/lower fence (upper fence= $Q3+1.5 \times IQR$  and lower fence= $Q1-1.5 \times IQR$ ), only outlier points are shown; Mann-Whitney, two-tailed tests. Panels E and F compared the difference in population medians between 2-, 3-, 4-, and 5-year-old samples, averaged by core or FOV, with Kruskal-Wallis rank sum statistic (h-statistic) indicated.

**Supplemental Fig. 3| Using mutually exclusive genes to evaluate platform specificity.** (A-C) Scatter plots of gene expression level (transcript counts per cell) for two representative mutually exclusive lineage-specific genes within (A) Xenium, (B) CosMx, and (C) scRNA-seq datasets generated from colon biopsies collected from HC and UC patients (GSE250487). Genes were selected based on cell types of interest and the overlapping genes between Xenium and CosMx panels. The mutually exclusive co-expression rate (MECR) value is listed for each scatter plot, with lower rates corresponding to greater technology specificity.

**Supplemental Fig. 4| Reproducibility of Xenium replicates.** (A) Scatter plot showing the gene expression level (transcript counts per cell) for all genes between Xenium replicates. (B) Cell frequency as a percent of

dataset total for fine annotations within Xenium replicates. **(C)** UMAP visualization of two integrated Xenium replicate runs, colored by fine annotations (582,188 total cells: 313,940 from replicate 1 and 268,248 from replicate 2). Xenium replicate data were obtained from different runs of different sections from same TMA block. **Supplemental Fig. 5| Xenium dataset landmark gene heatmap and correlation matrix for fine annotations, and DEGs between UC and HC.** **(A,B)** Fine cell annotation **(A)** heatmap displaying gene expression of the top 3 landmark genes and **(B)** correlation matrix in Xenium replicate 1. **(C)** Dot plot representation of a subset of genes from pseudobulk DEG analysis by coarse annotations.

**Supplemental Fig. 6| GSEA of an external, publicly-available, bulk transcriptomic dataset using a CosMx transcriptomic signature associated with UC PRE biopsies.** **(A)** GSEA of CosMx UC PRE spatial gene signature in an external cohort of patients and relative NES. **(B)** Number of DE genes in the UC PRE signature for Xenium and CosMx that are concordantly or discordantly expressed to the UC PRE patients from the publicly available dataset.

**Supplemental Fig. 7| Quantitation of differential cell abundance in the Xenium integrated dataset.** Cell frequencies of the indicated subsets comparing HC and UC PRE, each dot represents one patient; Mann–Whitney, two-tailed test with FDR correction;  $q < 0.1$  threshold for discovery. Only statistically significant cell subsets are shown with exact p-value and q-value displayed.

**Supplemental Fig. 8| Unsupervised Neighborhood enrichment analysis in Xenium FFPE colon biopsies and dot plot of neutrophil versus monocyte landmark genes.** **(A,B)** Heatmaps displaying neighborhood enrichment z-scores for fine annotation cell pairs within **(A)** HC and **(B)** UC PRE biopsies. **(C)** Dot plot representation of landmark genes for the indicated subsets. For panels **A** and **B**, several values exceed the scale for visualization purposes (values greater than 200)..

**Supplemental Fig. 9| Pseudobulk DE gene analysis comparing UC PRE Non-Responders (UC PRE NR) versus UC PRE Responders (UC PRE R) in the Xenium dataset.** **(A)** Volcano plot of pseudobulk DE genes identified by DESeq2 with  $\log_2fc > 0.4$  or  $< -0.4$  and  $q < 0.1$  in UC PRE NR vs UC PRE R. **(B)** Heatmap of expression z-scores for the indicated genes in UC PRE NR (Up/Down) relative to UC PRE R. **(C)** Representative spatial transcript scatter plots highlighting a subset of genes relatively increased in UC PRE R (left) and UC PRE NR (right). **(D)** GSEA of Xenium signatures in external cohort of patients pre-VDZ stratified by UC PRE NR and UC PRE R with relative Normalized Enrichment Scores (NES) and FDR q-value. For panel **B**, some genes are off-scale for visualization purposes, z-score set from -1 to 1.

**Supplementary Table 1.** Baseline demographic and clinical data for study participants. Categorical variables were analyzed by Chi-square test and continuous variables were compared using one-way ANOVA with FDR

correction or Mann-Whitney test where appropriate. ns, not significant; n/a, not applicable; pre, pre-VDZ treatment; post, post-VDZ treatment. VDZ-vedolizumab.

**Supplementary Table 2. Gene panels for the different spatial transcriptomic platforms.**

**Supplementary Table 3. Summarized QC results.**

**Supplementary Table 4. Pseudobulk DE gene analysis of Xenium data comparing colon biopsies in UC PRE versus HC.** Significance was set as  $\log_2\text{fc} > 0.4$  or  $< -0.4$ ,  $p\text{-adj} < 0.1$  and  $\text{baseMean} > 500$ .

**Supplementary Table 5. Pseudobulk DE gene analysis of CosMx data comparing colon biopsies in UC PRE versus HC.** Significance was set as  $\log_2\text{fc} > 0.4$  or  $< -0.4$ ,  $p\text{-adj} < 0.1$  and  $\text{baseMean} > 400$ .

**Supplementary Table 6. Pseudobulk DE gene analysis of Xenium data comparing colon biopsies in UC PRE Non-Responders versus UC PRE Responders.** Significance was set as  $\log_2\text{fc} > 0.4$  or  $< -0.4$ ,  $p\text{-adj} < 0.1$  and  $\text{baseMean} > 500$ .

**Supplementary Table 7. iSCST gene signatures used for Gene Set Enrichment Analysis (GSEA). Numeric ID, Affymetrix numeric probe identifier corresponding to each gene.**

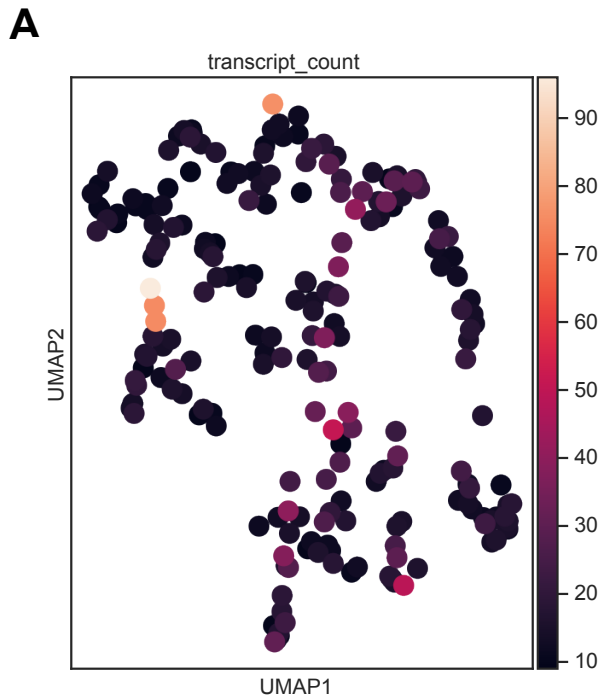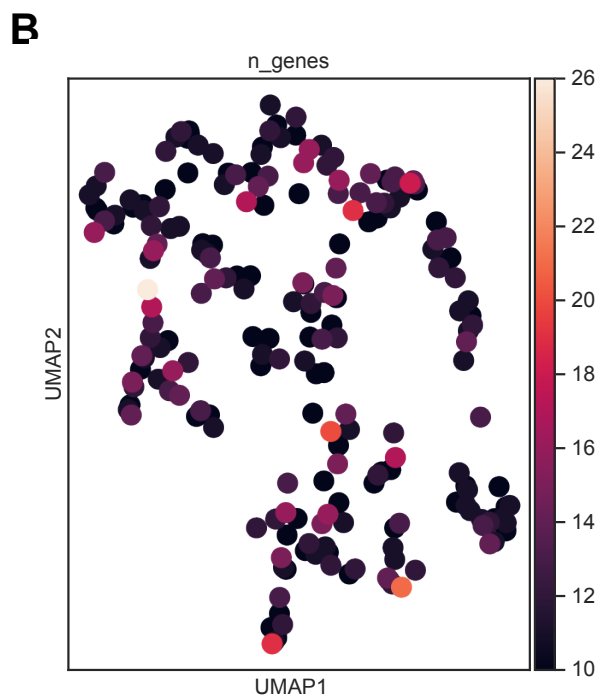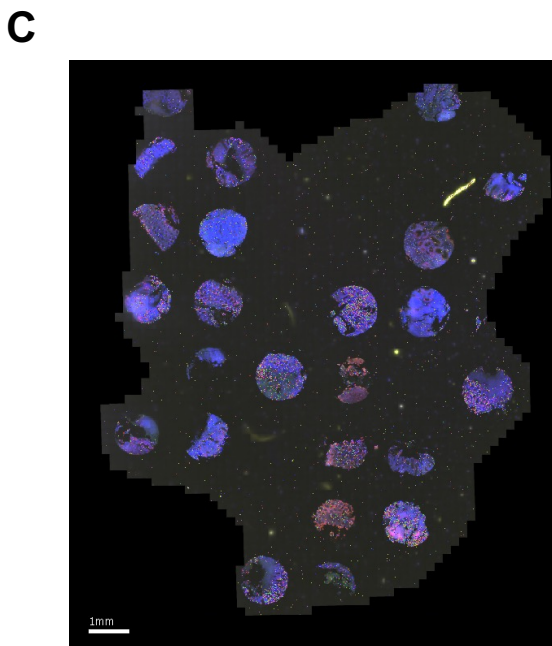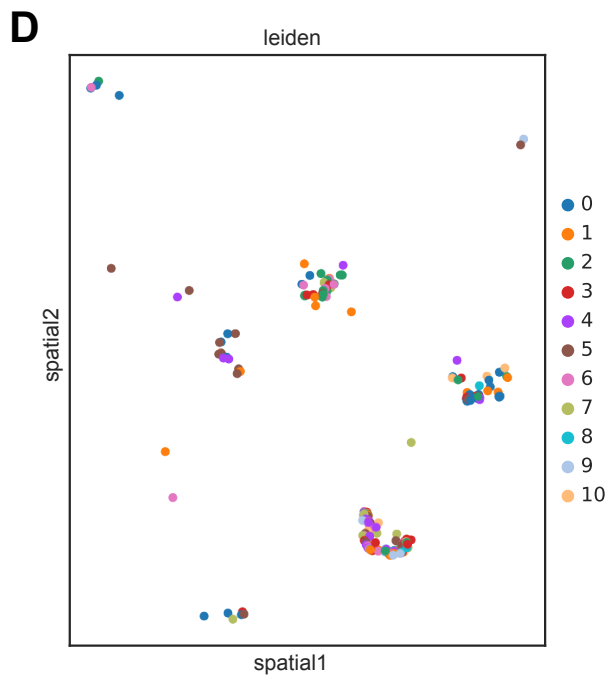

**Supplemental Fig. 1| MERSCOPE dataset analysis. (A,B)** UMAP visualization of MERSCOPE dataset (212 cells), highlighting **(A)** transcript count per cell, **(B)** number of genes per cell, and **(C)** area of TMA scanned showing DAPI and detected transcripts **(D)** spatial scatter plot depicting the spatial location of cells in the MERSCOPE dataset in relation to the TMA slide, colored based on leiden clustering.

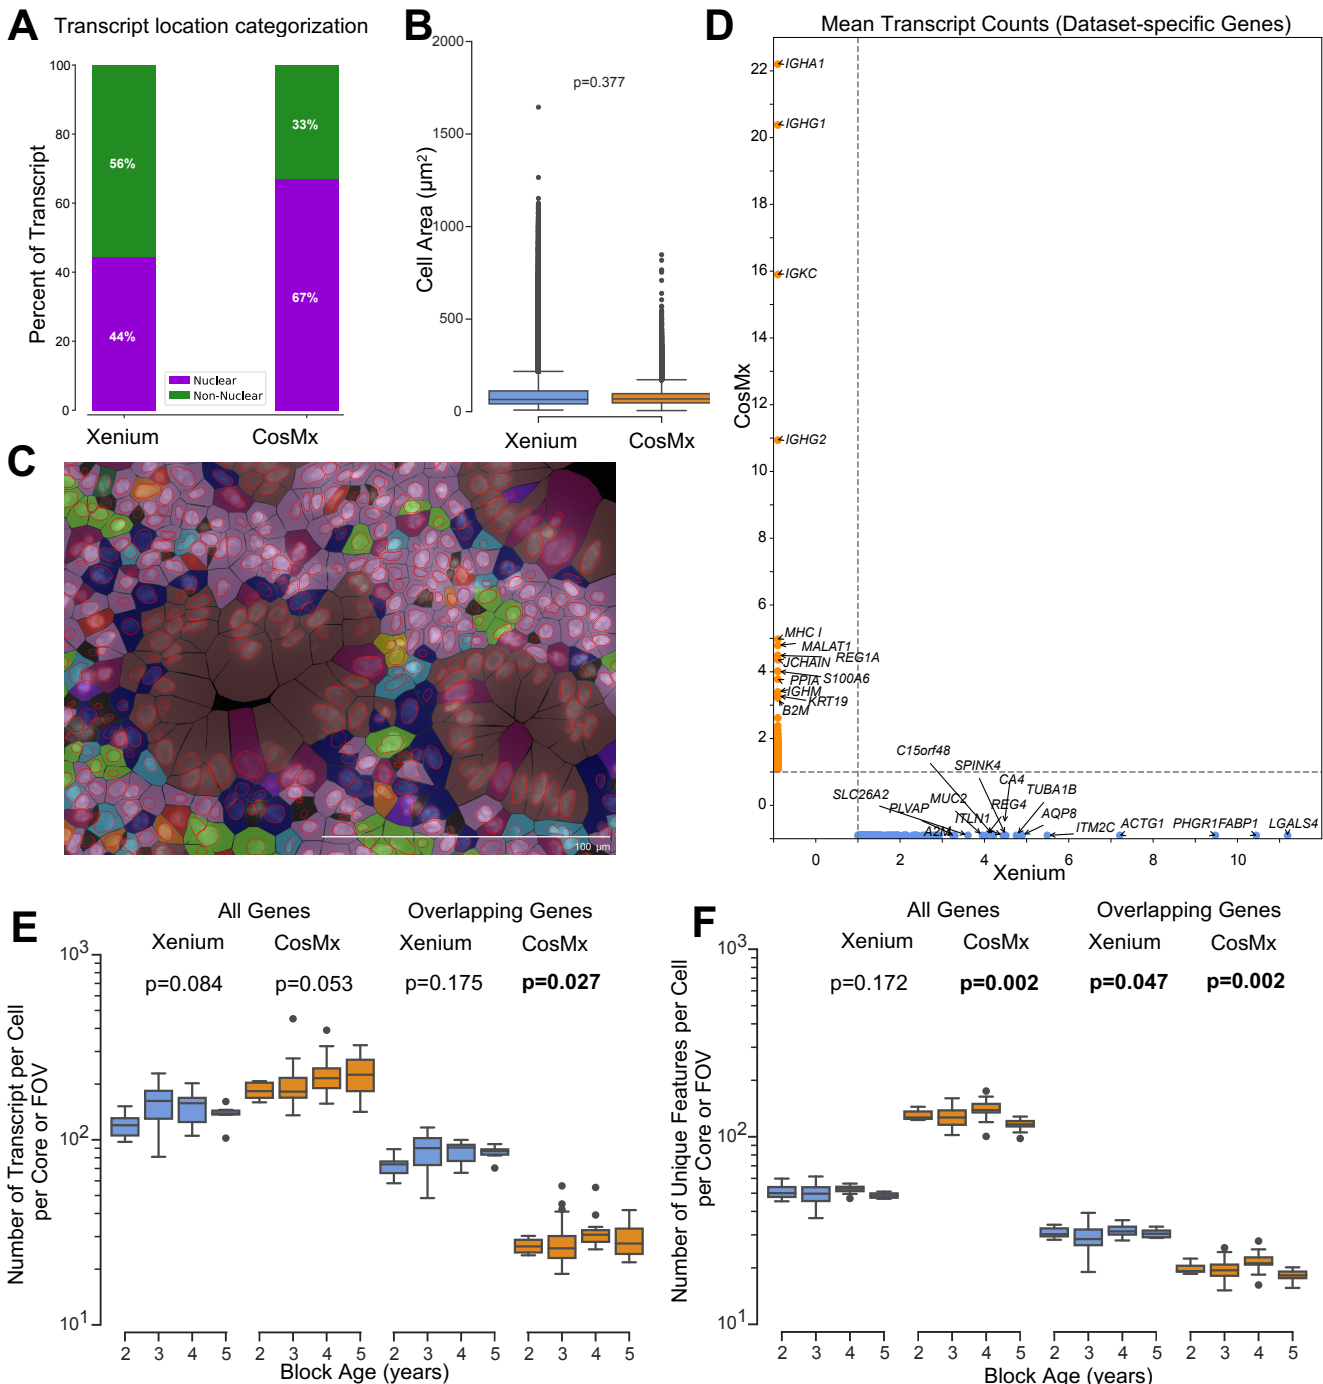

**Supplemental Fig. 2 | Xenium and CosMx dataset quality control and cell segmentation-related metrics. (A)** Bar plot comparing the percentage of nuclear versus non-nuclear transcripts within the Xenium and CosMx datasets. **(B)** Cell area plotted in  $\mu\text{m}^2$  for each cell within the Xenium and CosMx dataset. **(C)** Representative Xenium cell segmentation visualization, displaying DAPI nuclei (white), nuclei outlines (red), cell borders (black), cells are pseudocolored by Xenium fine annotation labels. **(D)** Scatter plot of average transcript count per cell for genes specific to either the Xenium or CosMx (blue for Xenium, and orange for CosMx). **(E, F)** Number of **(E)** transcripts and **(F)** unique features detected per cell per Core or FOV within the Xenium and CosMx datasets, calculated using the complete gene panel for each platform (Xenium, 290 genes; CosMx, 1,000 genes; left) and limited to the 159 overlapping genes across both panels (right). Plotted points are categorized based on the age of FFPE blocks from which they originated. For panels **B**, **E**, and **F**, box and whisker plots, the band indicates the median, the box indicates the first and third quartiles, and the whiskers indicate minimum and maximum value within the upper/lower fence (upper fence= $Q3+1.5 \times IQR$  and lower fence= $Q1-1.5 \times IQR$ ), only outlier points are shown; Mann-Whitney, two-tailed tests. Panels **E** and **F** compared the difference in population medians between 2-, 3-, 4-, and 5-year-old samples, averaged by core or FOV, with Kruskal-Wallis rank sum statistic (h-statistic) indicated.

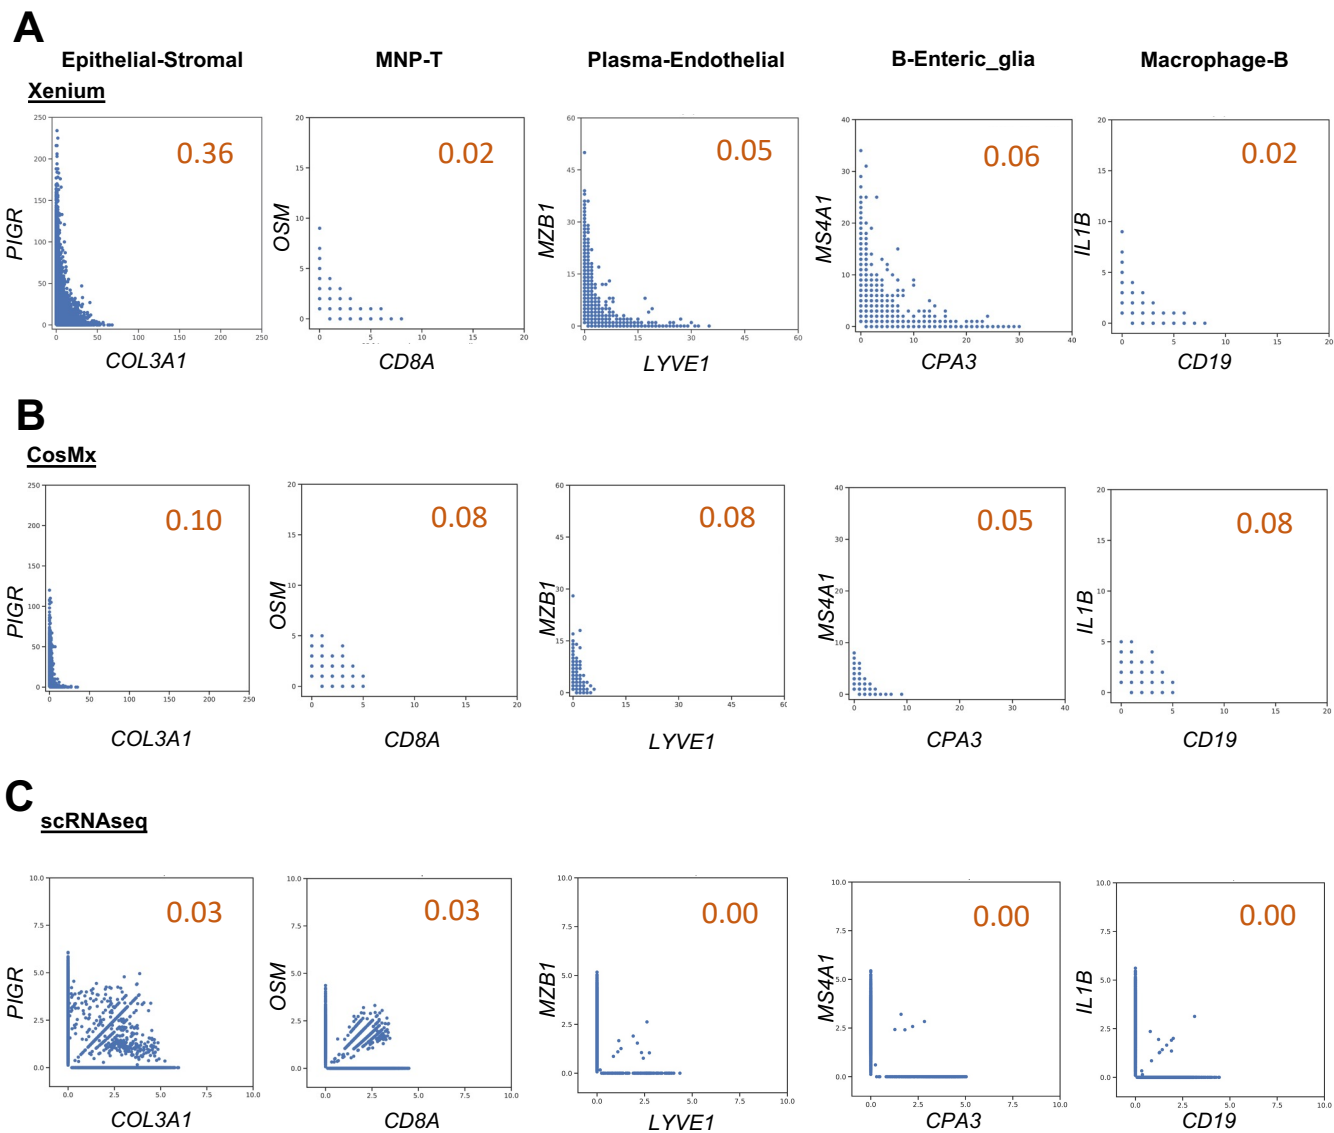

**Supplemental Fig. 3 | Using mutually exclusive genes to evaluate platform specificity. (A-C)** Scatter plots of gene expression level (transcript counts per cell) for two representative mutually exclusive lineage-specific genes within **(A)** Xenium, **(B)** CosMx, and **(C)** scRNA-seq datasets generated from colon biopsies collected from HC and UC patients (GSE250487). Genes were selected based on cell types of interest and the overlapping genes between Xenium and CosMx panels. The mutually exclusive co-expression rate (MECR) value is listed for each scatter plot, with lower rates corresponding to greater technology specificity.

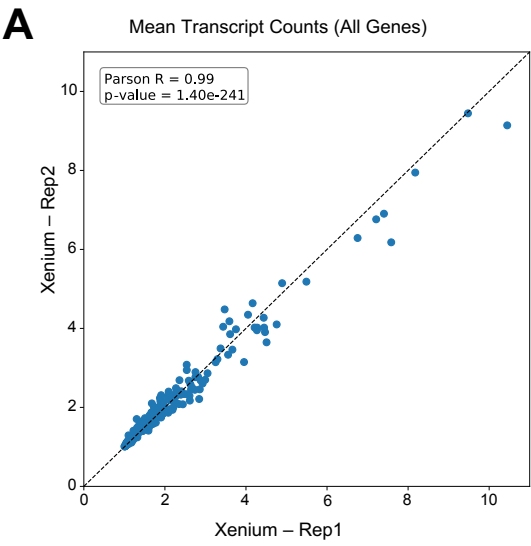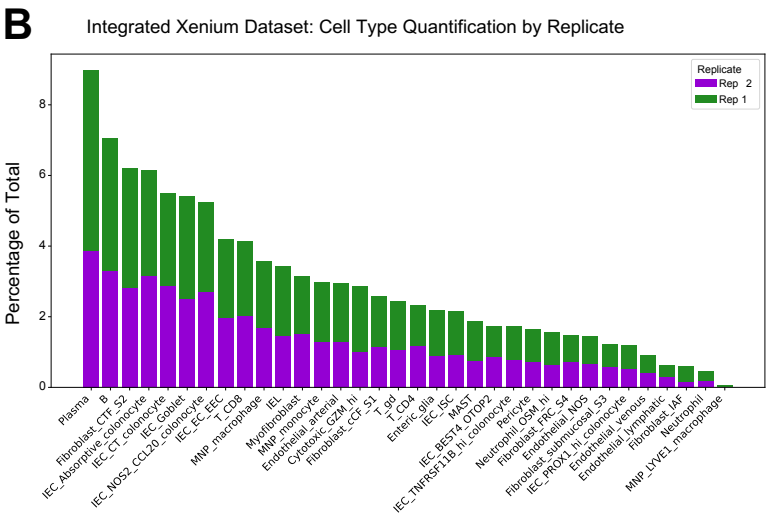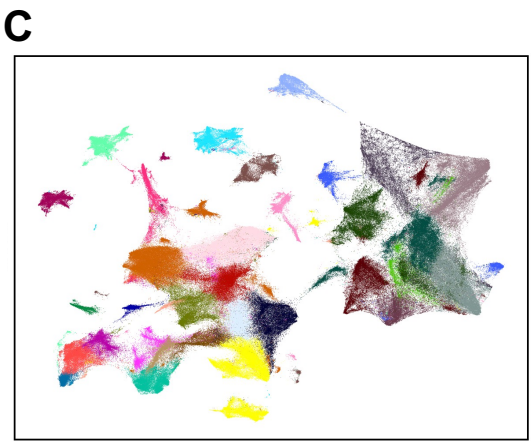

- #### Fine annotations
- B
  - Cytotoxic\_GZM\_hi
  - Endothelial\_NOS
  - Endothelial\_arterial
  - Endothelial\_lymphatic
  - Endothelial\_venous
  - Enteric\_glia
  - Fibroblast\_CTF\_S2
  - Fibroblast\_FRC\_S4
  - Fibroblast\_IAF
  - Fibroblast\_cCF\_S1
  - Fibroblast\_submucosal\_S3
  - IEC\_Absorptive\_colonocyte
  - IEC\_BEST4\_OTOP2
  - IEC\_CT\_colonocyte
  - IEC\_EC\_EEC
  - IEC\_Goblet
  - IEC\_ISC
  - IEC\_NOS2\_CCL20\_colonocyte
  - IEC\_PROX1\_hi\_colonocyte
  - IEC\_TNFRSF11B\_hi\_colonocyte
  - IEL
  - MAST
  - MNP\_LYVE1\_macrophage
  - MNP\_macrophage
  - MNP\_monocyte
  - Myofibroblast
  - Neutrophil
  - Neutrophil\_OSM\_hi
  - Pericyte
  - Plasma
  - T\_CD4
  - T\_CD8
  - T\_gd

**Supplemental Fig. 4| Reproducibility of Xenium replicates.** (A) Scatter plot showing the gene expression level (transcript counts per cell) for all genes between Xenium replicates. (B) Cell frequency as a percent of dataset total for fine annotations within Xenium replicates. (C) UMAP visualization of two integrated Xenium replicate runs, colored by fine annotations (582,188 total cells: 313,940 from replicate 1 and 268,248 from replicate 2). Xenium replicate data were obtained from different runs of different sections from same TMA block.







**A** IBD cohort (Arijs et al., 2018; GSE73661)  
(HC=12; UC PRE=43)

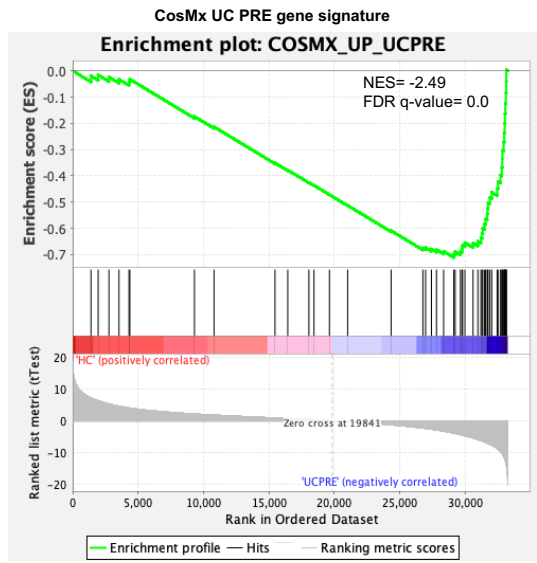

**B**

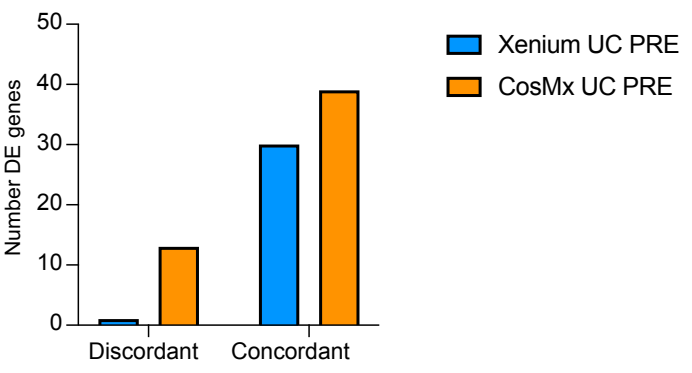

**Supplemental Fig. 6| GSEA of an external, publicly-available, bulk transcriptomic dataset using a CosMx transcriptomic signature associated with UC PRE biopsies. (A)** GSEA of CosMx UC PRE spatial gene signature in an external cohort of patients and relative NES. **(B)** Number of DE genes in the UC PRE signature for Xenium and CosMx that are concordantly or discordantly expressed to the UC PRE patients from the publicly available dataset.

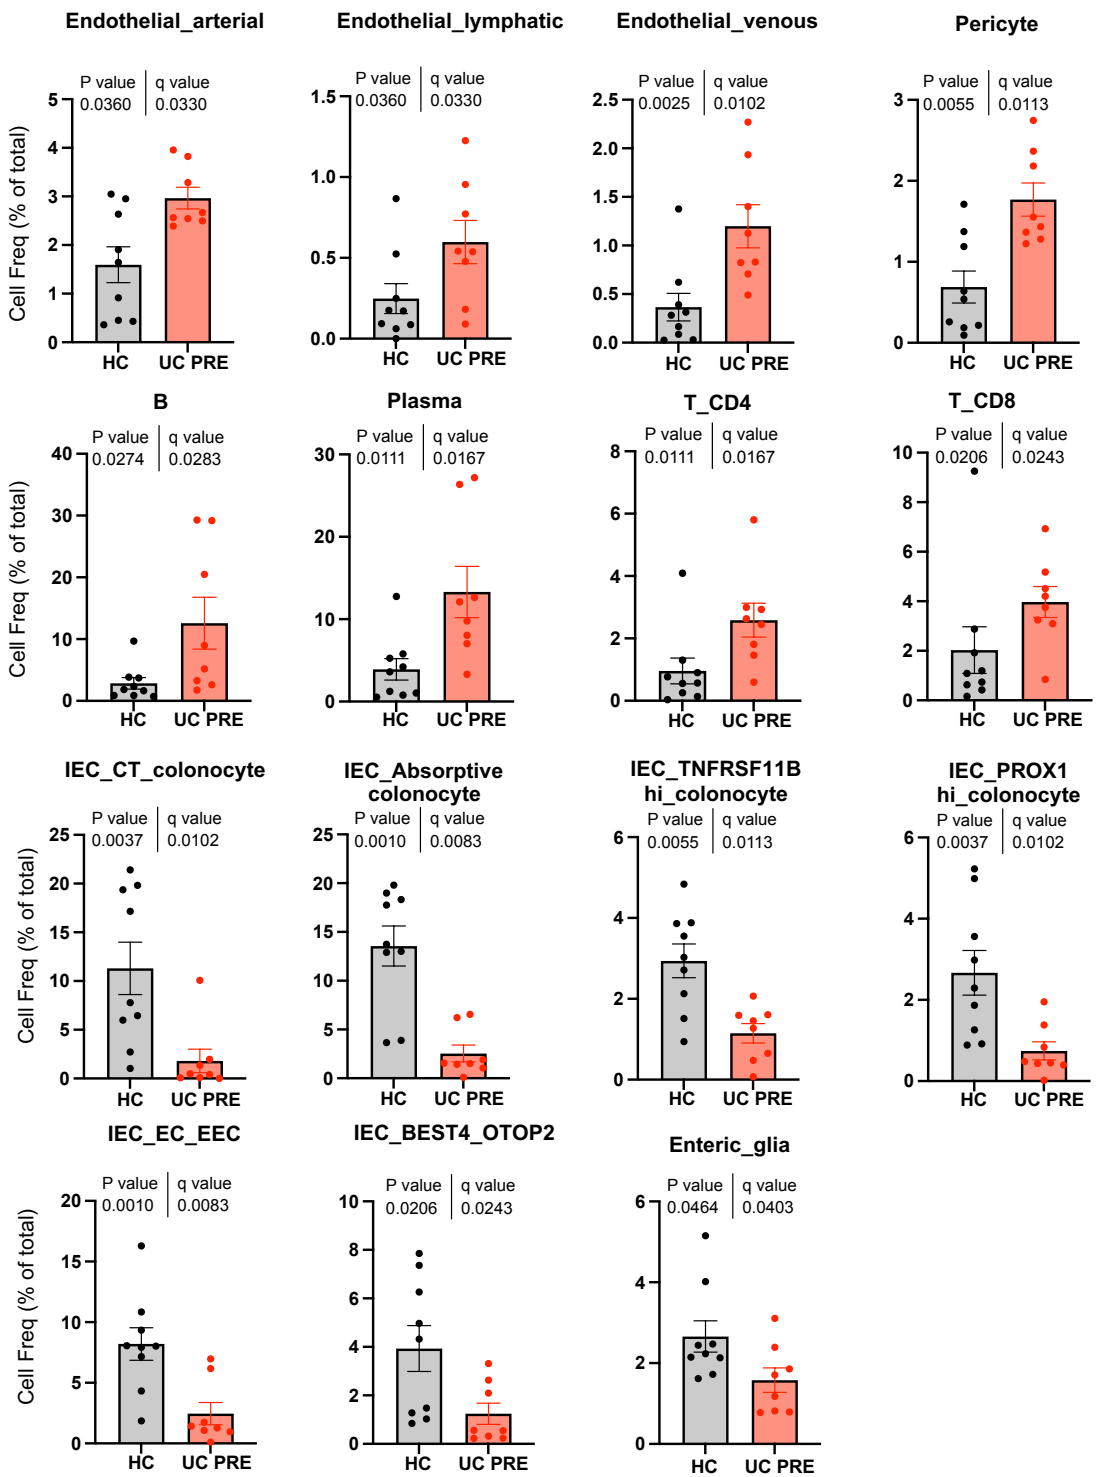

**Supplemental Fig. 7] Quantitation of differential cell abundance in the Xenium integrated dataset.** Cell frequencies of the indicated subsets comparing HC and UC PRE, each dot represents one patient; Mann–Whitney, two-tailed test with FDR correction;  $q < 0.1$  threshold for discovery. Only statistically significant cell subsets are shown with exact p-value and q-value displayed.

**A**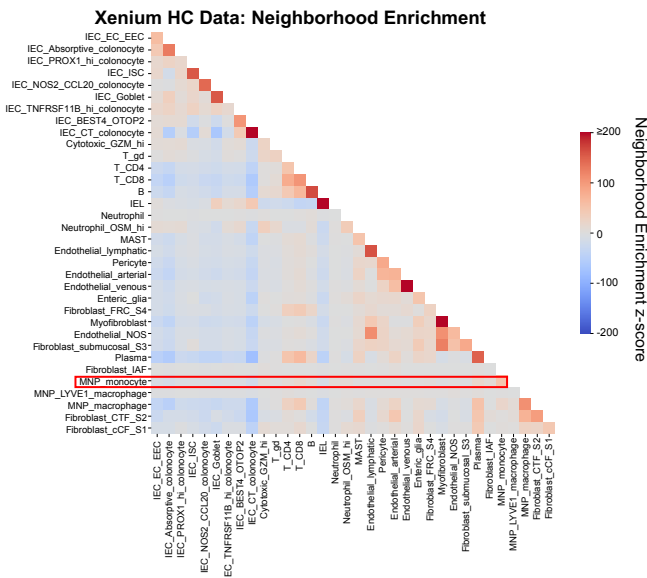**B**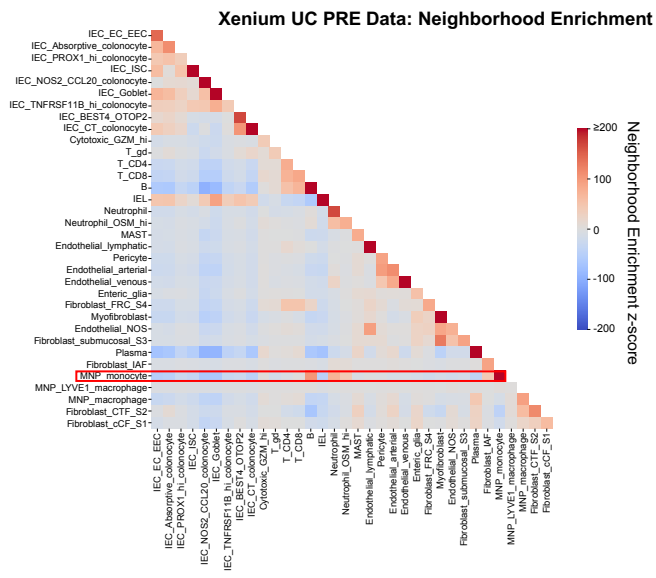**C**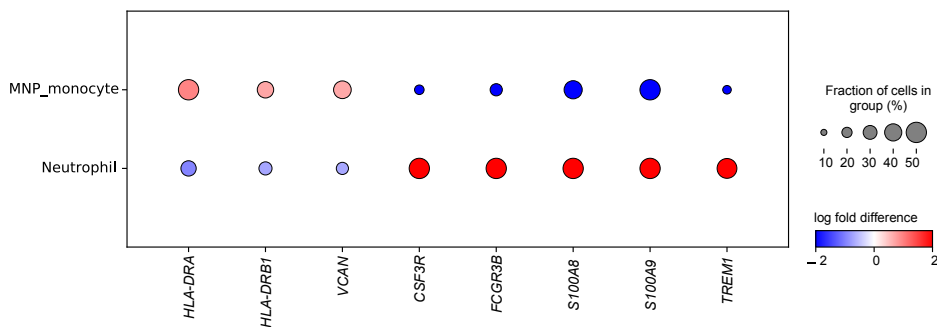

**Supplemental Fig. 8] Unsupervised Neighborhood enrichment analysis in Xenium FFPE colon biopsies and dot plot of neutrophil versus monocyte landmark genes. (A,B)** Heatmaps displaying neighborhood enrichment z-scores for fine annotation cell pairs within (A) HC and (B) UC PRE biopsies. (C) Dot plot representation of landmark genes for the indicated subsets. For panels A and B, several values exceed the scale for visualization purposes (values greater than 200).



| Patient ID | Age (y) | Sex | Disease status | UC Medication | Disease duration (y) | Duration VDZ (mo) | Prior anti-TNF exposure | Montreal classification | Mayo Endoscopic subscore | Responder to VDZ |
|------------|---------|-----|----------------|---------------|----------------------|-------------------|-------------------------|-------------------------|--------------------------|------------------|
| HS31       | 60-69   | F   | HC             | None          | n/a                  | n/a               | No                      | n/a                     | 0                        | n/a              |
| HS33       | 30-39   | M   | HC             | None          | n/a                  | n/a               | No                      | n/a                     | 0                        | n/a              |
| HS35       | 20-29   | F   | HC             | None          | n/a                  | n/a               | No                      | n/a                     | 0                        | n/a              |
| HS37       | 20-29   | M   | HC             | None          | n/a                  | n/a               | No                      | n/a                     | 0                        | n/a              |
| HS39       | 20-29   | F   | HC             | None          | n/a                  | n/a               | No                      | n/a                     | 0                        | n/a              |
| HS40       | 60-69   | M   | HC             | None          | n/a                  | n/a               | No                      | n/a                     | 0                        | n/a              |
| HS41       | 50-59   | M   | HC             | None          | n/a                  | n/a               | No                      | n/a                     | 0                        | n/a              |
| HS42       | 40-49   | M   | HC             | None          | n/a                  | n/a               | No                      | n/a                     | 0                        | n/a              |
| HS43       | 50-59   | M   | HC             | None          | n/a                  | n/a               | No                      | n/a                     | 0                        | n/a              |
| HS32       | 20-29   | F   | UC             | VDZ           | 2                    | 4                 | No                      | E2                      | pre 2 ; post 0           | Yes              |
| HS34       | 30-39   | F   | UC             | VDZ           | 1                    | 6                 | No                      | E1                      | pre 2; post 0            | Yes              |
| HS36       | 40-49   | M   | UC             | VDZ           | 3                    | 2                 | Yes                     | E2                      | pre 3; post 0            | Yes              |
| HS38       | 50-59   | M   | UC             | VDZ           | 25                   | 7                 | Yes                     | E3                      | pre 2; post 0            | Yes              |
| HS44       | 30-39   | F   | UC             | VDZ           | 2                    | 2                 | No                      | E1                      | pre 1                    | Yes              |
| HS45       | 40-49   | M   | UC             | VDZ           | 14                   | 19                | Yes                     | E2                      | pre 1; post 3            | No               |
| HS46       | 40-49   | n/a | UC             | VDZ           | 21                   | 2                 | Yes                     | E2                      | pre 3; post 3            | No               |
| HS47       | 30-39   | M   | UC             | VDZ           | 11                   | 5                 | Yes                     | E2                      | post 3                   | No               |
| HS48       | 70-79   | M   | UC             | VDZ           | 8                    | 6                 | Yes                     | E3                      | pre 2; post 2            | No               |
| HS49       | 30-39   | F   | UC             | VDZ           | 2                    | 3                 | Yes                     | E2                      | pre 2; post 3            | No               |
| HS50       | 20-29   | M   | UC             | VDZ           | 0                    | 5                 | Yes                     | E2                      | pre 2; post 2            | No               |
|            |         |     |                |               | 3 (2-14)             |                   |                         |                         |                          |                  |
| p-value    | ns      | ns  | p<0.0001       | p<0.0001      | n/a                  | n/a               | p=0.0010                | ns                      | pre, ns; post, p=0.0016  |                  |

**Supplementary Table 1. Baseline demographic and clinical data for study participants.** Categorical variables were analyzed by Chi-square test and continuous variables were compared using one-way ANOVA with FDR correction or Mann-Whitney test where appropriate. ns, not significant; n/a, not applicable; pre, pre-VDZ treatment; post, post-VDZ treatment. VDZ-vedolizumab.

| Assay type                   | Target       | Vendor       |
|------------------------------|--------------|--------------|
| Xenium 290-plex custom panel | ACM          | 10x Genomics |
|                              | ABCC9        | 10x Genomics |
|                              | ACKR1        | 10x Genomics |
|                              | ACTG1        | 10x Genomics |
|                              | ADAMDEC1     | 10x Genomics |
|                              | ADGRB3       | 10x Genomics |
|                              | AFG2         | 10x Genomics |
|                              | ALOX5        | 10x Genomics |
|                              | ALOX5AP      | 10x Genomics |
|                              | ANKK2        | 10x Genomics |
|                              | APOE         | 10x Genomics |
|                              | APP          | 10x Genomics |
|                              | AQP8         | 10x Genomics |
|                              | ASCL2        | 10x Genomics |
|                              | ASPM         | 10x Genomics |
|                              | BANK1        | 10x Genomics |
|                              | BASP1        | 10x Genomics |
|                              | BATF         | 10x Genomics |
|                              | BEST1        | 10x Genomics |
|                              | C15orf48     | 10x Genomics |
|                              | C1QA         | 10x Genomics |
|                              | C1QB         | 10x Genomics |
|                              | C1QC         | 10x Genomics |
|                              | C3           | 10x Genomics |
|                              | C7           | 10x Genomics |
|                              | CA4          | 10x Genomics |
|                              | CA7          | 10x Genomics |
|                              | CACNA1A      | 10x Genomics |
|                              | CALD1        | 10x Genomics |
|                              | CAV1         | 10x Genomics |
|                              | CCDC80       | 10x Genomics |
|                              | CCL20        | 10x Genomics |
|                              | CCL23        | 10x Genomics |
|                              | CCL4         | 10x Genomics |
|                              | CCL5         | 10x Genomics |
|                              | CCL8         | 10x Genomics |
|                              | CCR6         | 10x Genomics |
|                              | CCR7         | 10x Genomics |
|                              | CCSER1       | 10x Genomics |
|                              | CD14         | 10x Genomics |
|                              | CD19         | 10x Genomics |
|                              | CD1C         | 10x Genomics |
|                              | CD1D         | 10x Genomics |
|                              | CD209        | 10x Genomics |
|                              | CD28         | 10x Genomics |
|                              | CD3D         | 10x Genomics |
|                              | CD3E         | 10x Genomics |
|                              | CD4          | 10x Genomics |
|                              | CD40         | 10x Genomics |
|                              | CD44         | 10x Genomics |
|                              | CD59         | 10x Genomics |
|                              | CD69         | 10x Genomics |
|                              | CD7          | 10x Genomics |
|                              | CD79A        | 10x Genomics |
|                              | CD80         | 10x Genomics |
|                              | CD86         | 10x Genomics |
|                              | CD8A         | 10x Genomics |
|                              | CD8B         | 10x Genomics |
|                              | CDH5         | 10x Genomics |
|                              | CEACAM1      | 10x Genomics |
|                              | CEACAM6      | 10x Genomics |
|                              | CLDN5        | 10x Genomics |
|                              | CLEC10A      | 10x Genomics |
|                              | CLEC3A       | 10x Genomics |
|                              | CLU          | 10x Genomics |
|                              | COL1A1       | 10x Genomics |
|                              | COL1A2       | 10x Genomics |
|                              | COL3A1       | 10x Genomics |
|                              | COL6A2       | 10x Genomics |
|                              | CPA3         | 10x Genomics |
|                              | CPE          | 10x Genomics |
|                              | CRYAB        | 10x Genomics |
|                              | CSP3R        | 10x Genomics |
|                              | CSPG4        | 10x Genomics |
|                              | CST3         | 10x Genomics |
|                              | CTLA4        | 10x Genomics |
|                              | CTSL         | 10x Genomics |
|                              | CXCL14       | 10x Genomics |
|                              | CXCR1        | 10x Genomics |
|                              | CXCR5        | 10x Genomics |
|                              | CYTH1        | 10x Genomics |
|                              | DDC          | 10x Genomics |
|                              | DUSP1        | 10x Genomics |
|                              | DUSP23       | 10x Genomics |
|                              | EPCAM        | 10x Genomics |
|                              | F3           | 10x Genomics |
|                              | FABP1        | 10x Genomics |
|                              | FABP2        | 10x Genomics |
|                              | FABP5        | 10x Genomics |
|                              | FCER1A       | 10x Genomics |
|                              | FCER1G       | 10x Genomics |
|                              | FCER2        | 10x Genomics |
|                              | FCGR3A       | 10x Genomics |
|                              | FCGR3B       | 10x Genomics |
|                              | FCN1         | 10x Genomics |
|                              | FLT3         | 10x Genomics |
|                              | FOLR3        | 10x Genomics |
|                              | FOXP3        | 10x Genomics |
|                              | FXYD5        | 10x Genomics |
|                              | FYB1         | 10x Genomics |
| GATA2                        | 10x Genomics |              |
| GATA3                        | 10x Genomics |              |
| GLIS3                        | 10x Genomics |              |
| GPR115                       | 10x Genomics |              |
| GSN                          | 10x Genomics |              |
| GUCA2A                       | 10x Genomics |              |
| GZMA                         | 10x Genomics |              |
| GZMB                         | 10x Genomics |              |
| GZMK                         | 10x Genomics |              |
| HAND2                        | 10x Genomics |              |
| HLA-DRA                      | 10x Genomics |              |
| HLA-DRB1                     | 10x Genomics |              |
| HMG2                         | 10x Genomics |              |
| HMG2                         | 10x Genomics |              |
| HPGD5                        | 10x Genomics |              |
| ICOS                         | 10x Genomics |              |
| IFITM2                       | 10x Genomics |              |
| IFNG                         | 10x Genomics |              |
| IGHA2                        | 10x Genomics |              |
| IGHD                         | 10x Genomics |              |
| IGHH                         | 10x Genomics |              |
| IL10                         | 10x Genomics |              |
| IL10RA                       | 10x Genomics |              |
| IL13RA2                      | 10x Genomics |              |
| IL18R1                       | 10x Genomics |              |
| IL1B                         | 10x Genomics |              |
| IL1R1                        | 10x Genomics |              |
| IL1R2                        | 10x Genomics |              |
| IL1RL1                       | 10x Genomics |              |
| IL32                         | 10x Genomics |              |
| IL3RA                        | 10x Genomics |              |
| IL7R                         | 10x Genomics |              |
| INAVA                        | 10x Genomics |              |
| INSM1                        | 10x Genomics |              |
| IRF1                         | 10x Genomics |              |
| IRF8                         | 10x Genomics |              |
| ITGAX                        | 10x Genomics |              |
| ITLN1                        | 10x Genomics |              |
| ITM2C                        | 10x Genomics |              |
| JAK1                         | 10x Genomics |              |
| JAK2                         | 10x Genomics |              |
| JAK3                         | 10x Genomics |              |
| JUN                          | 10x Genomics |              |
| KCNK18                       | 10x Genomics |              |
| KIT                          | 10x Genomics |              |
| KLF2                         | 10x Genomics |              |

|           |              |        |
|-----------|--------------|--------|
| KLRB1     | 10x Genomics |        |
| KLRC2     | 10x Genomics |        |
| KLRF1     | 10x Genomics |        |
| KRT8      | 10x Genomics |        |
| LAMP3     | 10x Genomics |        |
| LEF1      | 10x Genomics |        |
| LEFTY1    | 10x Genomics |        |
| LGALS4    | 10x Genomics |        |
| LGR5      | 10x Genomics |        |
| LILRA4    | 10x Genomics |        |
| LST1      | 10x Genomics |        |
| LTA       | 10x Genomics |        |
| LTB       | 10x Genomics |        |
| LTBR      | 10x Genomics |        |
| LYPD8     | 10x Genomics |        |
| LVE1      | 10x Genomics |        |
| LVZ       | 10x Genomics |        |
| MAF       | 10x Genomics |        |
| MCAM      | 10x Genomics |        |
| MEF2C     | 10x Genomics |        |
| MGLL      | 10x Genomics |        |
| MKI67     | 10x Genomics |        |
| MMP1      | 10x Genomics |        |
| MMP3      | 10x Genomics |        |
| MIRN1     | 10x Genomics |        |
| MRC1      | 10x Genomics |        |
| MSA1      | 10x Genomics |        |
| MSA2      | 10x Genomics |        |
| MSA7      | 10x Genomics |        |
| MSA8      | 10x Genomics |        |
| MT1G      | 10x Genomics |        |
| MUC1      | 10x Genomics |        |
| MUC2      | 10x Genomics |        |
| MTH11     | 10x Genomics |        |
| MZB1      | 10x Genomics |        |
| NCAM1     | 10x Genomics |        |
| NEUROD1   | 10x Genomics |        |
| NFBIA     | 10x Genomics |        |
| NG2       | 10x Genomics |        |
| NOS2      | 10x Genomics |        |
| NOTCH3    | 10x Genomics |        |
| NOTCH4    | 10x Genomics |        |
| NPC2      | 10x Genomics |        |
| NTRK2     | 10x Genomics |        |
| NUPR1     | 10x Genomics |        |
| OGN       | 10x Genomics |        |
| OLFM4     | 10x Genomics |        |
| OSM       | 10x Genomics |        |
| OSMR      | 10x Genomics |        |
| OTOP2     | 10x Genomics |        |
| PDGFRA    | 10x Genomics |        |
| PECAM1    | 10x Genomics |        |
| PHGR1     | 10x Genomics |        |
| PHLDA2    | 10x Genomics |        |
| PGR       | 10x Genomics |        |
| PLAC8     | 10x Genomics |        |
| PLP1      | 10x Genomics |        |
| PLVAP     | 10x Genomics |        |
| POSTN     | 10x Genomics |        |
| PRDX1     | 10x Genomics |        |
| PTGS2     | 10x Genomics |        |
| PTPRC     | 10x Genomics |        |
| PYY       | 10x Genomics |        |
| QDPR      | 10x Genomics |        |
| RGS4      | 10x Genomics |        |
| RGCC      | 10x Genomics |        |
| RGSS      | 10x Genomics |        |
| RORC      | 10x Genomics |        |
| RTN2      | 10x Genomics |        |
| S100A11   | 10x Genomics |        |
| S100A12   | 10x Genomics |        |
| S100A16   | 10x Genomics |        |
| S100A4    | 10x Genomics |        |
| S100B     | 10x Genomics |        |
| S100A9    | 10x Genomics |        |
| S100B     | 10x Genomics |        |
| S100P     | 10x Genomics |        |
| S1PR1     | 10x Genomics |        |
| S1PR5     | 10x Genomics |        |
| SEC61B    | 10x Genomics |        |
| SELENOP   | 10x Genomics |        |
| SELL      | 10x Genomics |        |
| SERPINF1  | 10x Genomics |        |
| SH2D6     | 10x Genomics |        |
| SLC26A2   | 10x Genomics |        |
| SOX6      | 10x Genomics |        |
| SOX9      | 10x Genomics |        |
| SOX9      | 10x Genomics |        |
| SPARC     | 10x Genomics |        |
| SPARCL1   | 10x Genomics |        |
| SPINK1    | 10x Genomics |        |
| SPINK4    | 10x Genomics |        |
| SSR4      | 10x Genomics |        |
| STAT4     | 10x Genomics |        |
| STMN1     | 10x Genomics |        |
| TCF4      | 10x Genomics |        |
| TFE3      | 10x Genomics |        |
| TGFB1     | 10x Genomics |        |
| TGFB1     | 10x Genomics |        |
| TGFB1     | 10x Genomics |        |
| TGFB2     | 10x Genomics |        |
| TGIF1     | 10x Genomics |        |
| TIMP1     | 10x Genomics |        |
| TINAGL1   | 10x Genomics |        |
| TLE4      | 10x Genomics |        |
| TMAS1     | 10x Genomics |        |
| TMEM176A  | 10x Genomics |        |
| TMEM176B  | 10x Genomics |        |
| TNF       | 10x Genomics |        |
| TNFAIP3   | 10x Genomics |        |
| TNFRSF11A | 10x Genomics |        |
| TNFRSF11B | 10x Genomics |        |
| TNFRSF13B | 10x Genomics |        |
| TNFRSF17  | 10x Genomics |        |
| TNFRSF1A  | 10x Genomics |        |
| TNFRSF1B  | 10x Genomics |        |
| TNFRSF13B | 10x Genomics |        |
| TNFRSF15  | 10x Genomics |        |
| TNFRSF9   | 10x Genomics |        |
| TOP2A     | 10x Genomics |        |
| TPH1      | 10x Genomics |        |
| TPSAB1    | 10x Genomics |        |
| TPSB2     | 10x Genomics |        |
| TRAC      | 10x Genomics |        |
| TRAV1-2   | 10x Genomics |        |
| TRDC      | 10x Genomics |        |
| TRDV2     | 10x Genomics |        |
| TREM1     | 10x Genomics |        |
| TREM2     | 10x Genomics |        |
| TRGC1     | 10x Genomics |        |
| TRGC2     | 10x Genomics |        |
| TRGV9     | 10x Genomics |        |
| TRPM5     | 10x Genomics |        |
| TUBA1B    | 10x Genomics |        |
| TUBB      | 10x Genomics |        |
| TYK2      | 10x Genomics |        |
| TYROBP    | 10x Genomics |        |
| UBE2C     | 10x Genomics |        |
| VCAN      | 10x Genomics |        |
| VWF       | 10x Genomics |        |
| WDC2      | 10x Genomics |        |
| WNT5A     | 10x Genomics |        |
| XCR1      | 10x Genomics |        |
| ZBTB16    | 10x Genomics |        |
| ZFP98L1   | 10x Genomics |        |
| MIRSCOPE  | TMEM176A     | Viogen |
| 280-plex  | CD4          | Viogen |
| panel     | TNFRSF17     | Viogen |



TRPM5 Vezgen  
TNFRSF1A Vezgen  
CEACAM6 Vezgen  
OSM Vezgen  
GZMB Vezgen  
NFKBIA Vezgen  
TIMP1 Vezgen  
OLFM4 Vezgen  
MMP2 Vezgen  
AQP9 Vezgen  
TGFB1 Vezgen  
CD73A Vezgen  
NKG7 Vezgen  
SEC61B Vezgen  
COL1A1 Vezgen  
NFKB1 Vezgen  
IL10RA Vezgen  
CD69 Vezgen  
LTBR Vezgen  
IFNG Vezgen  
KLRB1 Vezgen  
GZMK Vezgen  
IL18R1 Vezgen  
SELL Vezgen  
TNFAIP3 Vezgen  
ADGRB3 Vezgen  
KCNJ8 Vezgen  
FLT3 Vezgen  
IL13RA2 Vezgen  
TREM1 Vezgen  
SOX9 Vezgen  
TNFSF9 Vezgen  
CCR7 Vezgen  
KLF2 Vezgen  
TPH1 Vezgen  
APOE Vezgen  
PLVAP Vezgen  
SEPPIN1 Vezgen  
CLEC10A Vezgen  
LYVE1 Vezgen  
ADAMDEC1 Vezgen  
REG4 Vezgen  
PDGFRA Vezgen  
ABCC9 Vezgen  
LYZ Vezgen  
VWF Vezgen  
PROX1 Vezgen  
TNFRSF13B Vezgen  
TYROBP Vezgen  
IL1B Vezgen  
NOTCH3 Vezgen  
CD44 Vezgen  
MCAM Vezgen  
MMRN1 Vezgen  
LAMP3 Vezgen  
LGR5 Vezgen  
ITGAX Vezgen  
IRF8 Vezgen  
IFNAR1 Vezgen  
TNFGL1 Vezgen  
S100A11 Vezgen  
LEFTY1 Vezgen  
FABP2 Vezgen  
OSMR Vezgen  
GZMA Vezgen  
QDPR Vezgen  
GPR15 Vezgen  
SLC26A2 Vezgen  
BATF Vezgen  
KIT Vezgen  
FCER1G Vezgen  
IL10RB Vezgen  
S100B Vezgen  
IL1RA4 Vezgen  
CXCR5 Vezgen  
SOX8 Vezgen  
NEUROD1 Vezgen  
HRGDS Vezgen  
CXCR1 Vezgen  
TGFB2 Vezgen  
CTLA4 Vezgen  
OPAS Vezgen  
S100P Vezgen  
SPINK1 Vezgen  
COL1A2 Vezgen  
TNFRSF11B Vezgen  
MMP3 Vezgen  
MSA48 Vezgen  
NOD2 Vezgen  
CD3D Vezgen  
CA4 Vezgen  
MEB1 Vezgen  
IL7R Vezgen  
COL3A1 Vezgen  
S1PR1 Vezgen  
TM6SF1 Vezgen  
CSFG4 Vezgen  
XCR1 Vezgen  
INSM1 Vezgen  
IL1RL1 Vezgen  
CD7 Vezgen  
C7 Vezgen  
NOS2 Vezgen  
RGSS Vezgen  
PHLDA2 Vezgen  
MMP1 Vezgen  
CD209 Vezgen  
ICOS Vezgen  
SOX9 Vezgen  
WCAM1 Vezgen  
AZM Vezgen  
BASP1 Vezgen  
DUOX2 Vezgen  
CD28 Vezgen  
NLRP12 Vezgen  
GLIS3 Vezgen  
CD19 Vezgen  
ITLN1 Vezgen  
TMEM176B Vezgen  
CD86 Vezgen  
IL3RA Vezgen  
ASCL2 Vezgen  
OTOP2 Vezgen  
F3 Vezgen  
ZBTB16 Vezgen  
IL21R Vezgen  
CAT Vezgen  
CTSL Vezgen  
GATA2 Vezgen  
CDH5 Vezgen  
CCR6 Vezgen  
JAK1 Vezgen  
VCAN Vezgen  
FCER2 Vezgen  
APP Vezgen  
IL23R Vezgen  
PTPRC Vezgen  
FYB1 Vezgen  
CDBA Vezgen  
CLEC9A Vezgen  
UBE2C Vezgen  
RORC Vezgen  
MSA47 Vezgen  
CCL20 Vezgen  
HAND2 Vezgen  
NTRK2 Vezgen  
HLA-DRB1 Vezgen

|           |       |
|-----------|-------|
| CYTH1     | Vzgen |
| MUC2      | Vzgen |
| CSF3R     | Vzgen |
| CD3E      | Vzgen |
| CALD1     | Vzgen |
| INAVA     | Vzgen |
| IFNGR1    | Vzgen |
| DUSP23    | Vzgen |
| FCER1A    | Vzgen |
| ACKR1     | Vzgen |
| CD1C      | Vzgen |
| CD1D      | Vzgen |
| IL6R      | Vzgen |
| MKG67     | Vzgen |
| S100A16   | Vzgen |
| S100A4    | Vzgen |
| S100A8    | Vzgen |
| S100A12   | Vzgen |
| S100A9    | Vzgen |
| JUN       | Vzgen |
| PTGDS     | Vzgen |
| FCN1      | Vzgen |
| BEST4     | Vzgen |
| CD40      | Vzgen |
| MMP9      | Vzgen |
| WFDC2     | Vzgen |
| TREM2     | Vzgen |
| RTKN2     | Vzgen |
| TNFSF15   | Vzgen |
| STMN1     | Vzgen |
| ALOX5     | Vzgen |
| C1QC      | Vzgen |
| TGFBR1    | Vzgen |
| NOTCH4    | Vzgen |
| ASP1      | Vzgen |
| OGN       | Vzgen |
| TNFSF13B  | Vzgen |
| FOXO3     | Vzgen |
| TNFRSF1B  | Vzgen |
| TLE4      | Vzgen |
| GATA3     | Vzgen |
| RGCC      | Vzgen |
| SPINK4    | Vzgen |
| IL2RA     | Vzgen |
| ALOX5AP   | Vzgen |
| JAK2      | Vzgen |
| IFNAR2    | Vzgen |
| TGIT      | Vzgen |
| TRDV2     | Vzgen |
| TRDC      | Vzgen |
| IGHF      | Vzgen |
| IGHD      | Vzgen |
| CD8B      | Vzgen |
| NLRP3     | Vzgen |
| FXR1      | Vzgen |
| STAT4     | Vzgen |
| MAF       | Vzgen |
| IL1R2     | Vzgen |
| CCL8      | Vzgen |
| HLA-DRA   | Vzgen |
| NUPR1     | Vzgen |
| CD59      | Vzgen |
| FABP5     | Vzgen |
| IRF7      | Vzgen |
| MCLL      | Vzgen |
| IFITM2    | Vzgen |
| CD14      | Vzgen |
| NLR4      | Vzgen |
| C1QA      | Vzgen |
| CRE       | Vzgen |
| CEACAM1   | Vzgen |
| CLU       | Vzgen |
| CAV1      | Vzgen |
| IFNGR2    | Vzgen |
| IL1R1     | Vzgen |
| PLAC8     | Vzgen |
| LTA       | Vzgen |
| ALR2      | Vzgen |
| TOP2A     | Vzgen |
| IL10      | Vzgen |
| LTB       | Vzgen |
| FCGR3A    | Vzgen |
| LST1      | Vzgen |
| HMG2      | Vzgen |
| CCDC80    | Vzgen |
| ZFP38L1   | Vzgen |
| TRG1      | Vzgen |
| DDC       | Vzgen |
| BANK1     | Vzgen |
| TRGV9     | Vzgen |
| TNF       | Vzgen |
| JAK3      | Vzgen |
| WNT5A     | Vzgen |
| CD80      | Vzgen |
| MUC1      | Vzgen |
| LEF1      | Vzgen |
| CCSER1    | Vzgen |
| C1QB      | Vzgen |
| CXCL14    | Vzgen |
| SELENP    | Vzgen |
| TYK2      | Vzgen |
| CRYAB     | Vzgen |
| IL32      | Vzgen |
| MSA41     | Vzgen |
| POSTN     | Vzgen |
| NPC2      | Vzgen |
| PECAM1    | Vzgen |
| MRC1      | Vzgen |
| ACTG1     | Vzgen |
| TNFRSF11A | Vzgen |
| CACNA1A   | Vzgen |
| LYPD8     | Vzgen |
| PYY       | Vzgen |
| C3        | Vzgen |
| CCL5      | Vzgen |
| DUOX2     | Vzgen |
| TRAC      | Vzgen |
| CCL4      | Vzgen |
| FCGR3B    | Vzgen |
| CCL23     | Vzgen |
| CCL18     | Vzgen |
| IKBK6     | Vzgen |
| MSA2      | Vzgen |
| S1PR5     | Vzgen |
| KLRP1     | Vzgen |
| CLDN5     | Vzgen |
| ALP1      | Vzgen |
| TCF4      | Vzgen |
| MEF2C     | Vzgen |
| SH2D6     | Vzgen |

Supplementary Table 2. Gene panels for the different spatial transcriptomic platforms.

| Run                                                  |                   | Xenium         | CosMx                |
|------------------------------------------------------|-------------------|----------------|----------------------|
| Panel size (Num. genes; num. neg probes)             |                   | 290; 20        | 1000; 10             |
|                                                      |                   | (Custom panel) | (Pre-designed panel) |
| Overlapping genes across panels                      |                   | 159            |                      |
| Percent of cells that passed QC                      |                   | 72%            | 78%                  |
| Mean transcripts per cell (Sensitivity)              | All genes         | 148            | 219                  |
|                                                      | Overlapping genes | 85             | 29                   |
| Mean unique genes counted per cell (Genomic Breadth) | All genes         | 51             | 132                  |
|                                                      | Overlapping genes | 31             | 20                   |
| Mean expression of each gene within cells            | All genes         | 2              | 1.33                 |
|                                                      | Overlapping genes | 2              | 1.3                  |
| Mean negative probe counts per cell                  |                   | 0.034          | 0.37                 |
| Mean signal detected per cell above background       |                   | 59             | 4                    |

**Supplementary Table 3. Summarized QC results.**

|           | baseMean   | log2FoldChange | lfcSE      | stat       | pvalue     | padj       | -log10 (padj) | Significance |
|-----------|------------|----------------|------------|------------|------------|------------|---------------|--------------|
| S100A8    | 1912.86507 | 3.877071757    | 0.78254345 | -4.9544492 | 7.25E-07   | 0.00021035 | 3.67705129    | yes          |
| IGHD      | 555.955821 | 2.7995075      | 0.696344   | -4.0202939 | 5.81E-05   | 0.00255326 | 2.59290428    | yes          |
| MS4A1     | 5393.16287 | 2.541605012    | 0.7152485  | -3.5534573 | 0.0003802  | 0.00648581 | 2.18803551    | yes          |
| S100A9    | 3473.14706 | 2.344474824    | 0.69231803 | -3.3868464 | 0.00070701 | 0.00891447 | 2.04990452    | yes          |
| TIMP1     | 4973.32528 | 2.086217495    | 0.52557312 | -3.9694144 | 7.20E-05   | 0.00255326 | 2.59290428    | yes          |
| CD79A     | 6817.54988 | 1.988670369    | 0.53065281 | -3.7475923 | 0.00017854 | 0.00363757 | 2.43918912    | yes          |
| C3        | 8969.74854 | 1.95141288     | 0.52254809 | -3.7344178 | 0.00018815 | 0.00363757 | 2.43918912    | yes          |
| CD19      | 3401.9927  | 1.850081789    | 0.59046468 | -3.1332641 | 0.00172874 | 0.01630356 | 1.78771753    | yes          |
| BANK1     | 4178.99064 | 1.823652303    | 0.58247153 | -3.1308866 | 0.00174279 | 0.01630356 | 1.78771753    | yes          |
| MZB1      | 15536.3626 | 1.812298856    | 0.45136199 | -4.0151783 | 5.94E-05   | 0.00255326 | 2.59290428    | yes          |
| JAK3      | 4521.55009 | 1.703751567    | 0.43113513 | -3.9517809 | 7.76E-05   | 0.00255326 | 2.59290428    | yes          |
| PTGDS     | 7751.66236 | 1.625414177    | 0.58242248 | -2.790782  | 0.00525809 | 0.03002352 | 1.52253846    | yes          |
| SELL      | 2560.14415 | 1.616523274    | 0.56725529 | -2.849728  | 0.00437566 | 0.03002352 | 1.52253846    | yes          |
| LTB       | 1866.54329 | 1.493209523    | 0.53337272 | -2.7995611 | 0.00511721 | 0.03002352 | 1.52253846    | yes          |
| S100A12   | 414.708353 | 1.403679815    | 0.62201356 | -2.2566708 | 0.02402865 | 0.07829562 | 1.10626256    | no           |
| NOS2      | 4415.26132 | 1.321676825    | 0.44145556 | -2.9939068 | 0.0027543  | 0.02218742 | 1.65389322    | yes          |
| IL1B      | 1957.75188 | 1.214190665    | 0.62098928 | -1.9552522 | 0.05055331 | 0.12973858 | 0.86693086    | no           |
| PECAM1    | 9946.17504 | 1.142853852    | 0.33090956 | -3.4536743 | 0.00055301 | 0.00801857 | 2.09590313    | yes          |
| CLU       | 5555.10391 | 1.133578759    | 0.44529262 | -2.545694  | 0.01090608 | 0.04893374 | 1.3103916     | yes          |
| SSR4      | 10887.252  | 1.099170797    | 0.42466536 | -2.5883222 | 0.00964447 | 0.04585076 | 1.33865343    | yes          |
| PTPRC     | 13970.3792 | 1.074416383    | 0.38313502 | -2.8042761 | 0.00504297 | 0.03002352 | 1.52253846    | yes          |
| REG4      | 15966.2714 | 1.02886571     | 0.67728103 | -1.5191119 | 0.12873432 | 0.25396567 | 0.59522499    | no           |
| IL7R      | 6618.94046 | 0.974229392    | 0.37835684 | -2.5748957 | 0.01002703 | 0.0468846  | 1.3289698     | yes          |
| TRAC      | 6948.11474 | 0.945210701    | 0.43059747 | -2.1951144 | 0.02815539 | 0.08675302 | 1.06171539    | yes          |
| BASP1     | 4239.58352 | 0.940309996    | 0.30325814 | -3.1006917 | 0.00193069 | 0.01662429 | 1.77925689    | yes          |
| COL1A1    | 27985.0535 | 0.90730443     | 0.40001618 | -2.2681693 | 0.02331889 | 0.07723413 | 1.11219073    | yes          |
| TNFRSF17  | 2792.8458  | 0.87596328     | 0.42961753 | -2.0389375 | 0.04145627 | 0.11559921 | 0.93704514    | no           |
| ALOX5     | 3354.62151 | 0.867041813    | 0.30673357 | -2.8266936 | 0.00470313 | 0.03002352 | 1.52253846    | yes          |
| MRC1      | 3356.91078 | 0.816368591    | 0.33015494 | -2.4726832 | 0.0134103  | 0.05401369 | 1.26749616    | yes          |
| SPINK4    | 10731.9425 | 0.790681008    | 0.72035586 | -1.0976256 | 0.27236802 | 0.44126663 | 0.35529892    | no           |
| TCF4      | 2331.13703 | 0.767445287    | 0.28785708 | -2.6660636 | 0.00767452 | 0.03904579 | 1.4084258     | yes          |
| COL1A2    | 24033.8077 | 0.765825491    | 0.39521009 | -1.9377681 | 0.05265152 | 0.13162881 | 0.88064905    | no           |
| HLA-DRB1  | 9531.98169 | 0.756374509    | 0.45318256 | -1.6690283 | 0.09511178 | 0.20121698 | 0.69633538    | no           |
| SEC61B    | 2324.72837 | 0.747724586    | 0.3799327  | -1.9680448 | 0.04906288 | 0.12703782 | 0.89606698    | no           |
| FYB1      | 3987.67501 | 0.736294259    | 0.37231454 | -1.9776135 | 0.04797232 | 0.12647249 | 0.89800393    | no           |
| FCER1G    | 6285.04915 | 0.72922225     | 0.37980601 | -1.9199861 | 0.05485966 | 0.13482458 | 0.87023092    | no           |
| SERPINF1  | 6266.924   | 0.721190193    | 0.2585434  | -2.7894357 | 0.00528    | 0.03002352 | 1.52253846    | yes          |
| FCGR3A    | 1237.8205  | 0.710101793    | 0.4076122  | -1.7421014 | 0.0814907  | 0.18462737 | 0.73370392    | no           |
| S100A11   | 10790.127  | 0.709428326    | 0.34734401 | -2.0424372 | 0.04110818 | 0.11559921 | 0.93704514    | no           |
| CCL20     | 1862.03197 | 0.698841203    | 0.36016724 | -1.9403242 | 0.05234031 | 0.13162881 | 0.88064905    | no           |
| CCR7      | 1745.05622 | 0.683942802    | 0.59985592 | -1.1401785 | 0.25421196 | 0.42290132 | 0.37376096    | no           |
| VWF       | 2640.62439 | 0.683547581    | 0.29572971 | -2.311393  | 0.02081116 | 0.07357857 | 1.13324868    | yes          |
| CD1D      | 1611.36803 | 0.676243014    | 0.24119119 | -2.8037633 | 0.005051   | 0.03002352 | 1.52253846    | yes          |
| CD3D      | 2876.52694 | 0.66733552     | 0.34928375 | -1.9105828 | 0.05605822 | 0.13661246 | 0.86450969    | no           |
| SPARC     | 16800.0698 | 0.666501158    | 0.43245795 | -1.541193  | 0.12326982 | 0.24653964 | 0.60811324    | no           |
| IL10RA    | 5656.27472 | 0.65260346     | 0.30879271 | -2.113403  | 0.03456629 | 0.10024223 | 0.99894928    | no           |
| MLP3      | 518.286632 | 0.642093989    | 0.58123327 | -1.1047096 | 0.26928543 | 0.43883121 | 0.35770249    | no           |
| CD44      | 22491.6212 | 0.635630985    | 0.29248921 | -2.1731776 | 0.02976696 | 0.08808589 | 1.05509365    | yes          |
| HLA-DRA   | 16413.3057 | 0.627693207    | 0.37933941 | -1.6547008 | 0.09798522 | 0.20296937 | 0.69256949    | no           |
| FCER2     | 1164.9854  | 0.626284012    | 0.56105117 | -1.116269  | 0.26430702 | 0.43550589 | 0.36100597    | no           |
| ITGAX     | 3566.65599 | 0.625895494    | 0.38019082 | -1.6462667 | 0.09970886 | 0.20507495 | 0.68808738    | no           |
| OSMR      | 2661.85795 | 0.616225186    | 0.22295788 | -2.7638637 | 0.00571214 | 0.03067631 | 1.51319695    | yes          |
| VCAN      | 4267.30924 | 0.615826417    | 0.34688374 | -1.7753107 | 0.0758466  | 0.17596411 | 0.75457591    | no           |
| COL3A1    | 35487.2811 | 0.598611296    | 0.40345989 | -1.4836947 | 0.13788994 | 0.26658722 | 0.57416068    | no           |
| MEF2C     | 3166.64943 | 0.595413511    | 0.24323126 | -2.4479317 | 0.01436789 | 0.05630659 | 1.24944081    | yes          |
| S100P     | 5597.95965 | 0.594878565    | 0.60142623 | -0.9891131 | 0.32260781 | 0.49500669 | 0.30538893    | no           |
| CTLA4     | 1716.01122 | 0.576267846    | 0.42670238 | -1.3505147 | 0.17685093 | 0.32255831 | 0.49139177    | no           |
| C1QB      | 2214.65925 | 0.57351651     | 0.39973295 | -1.4347492 | 0.15135859 | 0.28318704 | 0.54792662    | no           |
| CXCR5     | 1502.46352 | 0.554916287    | 0.60895445 | -0.9112608 | 0.362158   | 0.52776794 | 0.277557      | no           |
| CD40      | 2964.34461 | 0.55178545     | 0.33124179 | -1.6658087 | 0.09575153 | 0.20121698 | 0.69633538    | no           |
| COL6A2    | 9314.92282 | 0.523772485    | 0.43920322 | -1.1925516 | 0.23304505 | 0.40298668 | 0.39470931    | no           |
| NOTCH3    | 2021.86666 | 0.51846979     | 0.2550454  | -2.0328529 | 0.04206738 | 0.11618611 | 0.93484579    | no           |
| CD1C      | 870.394762 | 0.500083519    | 0.49480352 | -1.0106709 | 0.31217397 | 0.4859094  | 0.3134447     | no           |
| TNFRSF1B  | 5545.37429 | 0.492326925    | 0.26504261 | -1.8575387 | 0.06323454 | 0.15155387 | 0.81943298    | no           |
| ICOS      | 712.35705  | 0.488258905    | 0.33857912 | -1.4420821 | 0.1492792  | 0.28312927 | 0.54801523    | no           |
| IL1R1     | 6092.98725 | 0.481839517    | 0.28669859 | -1.6806484 | 0.09283124 | 0.20090342 | 0.69701267    | no           |
| ALOX5AP   | 1967.02909 | 0.468476406    | 0.33076371 | -1.4163477 | 0.15667374 | 0.29125247 | 0.53573038    | no           |
| CDCC80    | 3139.17565 | 0.456909155    | 0.46904628 | -0.9741238 | 0.32999506 | 0.5008332  | 0.30030689    | no           |
| C1QA      | 3218.33667 | 0.431689435    | 0.34505197 | -1.2510853 | 0.21090337 | 0.36844565 | 0.43362657    | no           |
| CD28      | 1851.17888 | 0.43024337     | 0.38951666 | -1.1045571 | 0.26935157 | 0.43883121 | 0.35770249    | no           |
| NFKBIA    | 6678.05303 | 0.430112392    | 0.3294757  | -1.305445  | 0.19174138 | 0.34324074 | 0.46440117    | no           |
| LYZ       | 27013.2345 | 0.42383674     | 0.43430122 | -0.975905  | 0.32911154 | 0.5008332  | 0.30030689    | no           |
| TNFRSF13B | 1217.16313 | 0.412392961    | 0.39341779 | -1.0482316 | 0.29453192 | 0.47190196 | 0.32614822    | no           |
| RGCC      | 1611.68025 | 0.402344956    | 0.23813367 | -1.6895761 | 0.09110909 | 0.19865891 | 0.70189195    | no           |
| CAV1      | 3118.44421 | 0.384585441    | 0.32277211 | -1.1915077 | 0.23345435 | 0.40298668 | 0.39470931    | no           |
| SPARCL1   | 10113.9213 | 0.369652816    | 0.38072271 | -0.970924  | 0.33158612 | 0.5008332  | 0.30030689    | no           |
| CCR6      | 1063.59855 | 0.362211737    | 0.41738856 | -0.8678047 | 0.38550128 | 0.55071611 | 0.25907222    | no           |
| WNT5A     | 3349.41961 | 0.349187366    | 0.44121659 | -0.7914194 | 0.4286993  | 0.60000541 | 0.22184484    | no           |
| CD4       | 3278.25061 | 0.34617996     | 0.24901295 | -1.3902087 | 0.16446552 | 0.30186709 | 0.52018423    | no           |
| CD80      | 589.995259 | 0.343685733    | 0.37686656 | -0.911956  | 0.36179186 | 0.52776794 | 0.277557      | no           |
| ZFP36L1   | 12275.9423 | 0.343468865    | 0.39226995 | -0.8755931 | 0.38125127 | 0.54734093 | 0.26174207    | no           |
| CD11D     | 12046.6369 | 0.335531377    | 0.42235337 | -0.7944328 | 0.4269435  | 0.60000541 | 0.22184484    | no           |
| TGFB2     | 7579.67825 | 0.333138574    | 0.28998669 | -1.1488064 | 0.2506358  | 0.4221352  | 0.37454844    | no           |
| OLFM4     | 25435.5281 | 0.314916332    | 0.63090143 | -0.499153  | 0.61767161 | 0.7311215  | 0.13601045    | no           |
| GPR15     | 3900.81575 | 0.309105497    | 0.58515506 | -0.5282454 | 0.59732899 | 0.72177253 | 0.14159965    | no           |
| LST1      | 515.700859 | 0.307866377    | 0.30134352 | -1.0216459 | 0.30694851 | 0.48116253 | 0.3177082     | no           |
| IL3RA     | 870.508283 | 0.307005814    | 0.30448954 | -1.0082639 | 0.31332779 | 0.4859094  | 0.3134447     | no           |
| C1QC      | 4069.13535 | 0.306134287    | 0.39341742 | -0.7781412 | 0.43648581 | 0.60276611 | 0.21985117    | no           |
| CTSL      | 5683.08235 | 0.295792977    | 0.31727063 | -0.9323049 | 0.35117896 | 0.51941117 | 0.28448872    | no           |
| F3        | 7352.51271 | 0.292489392    | 0.45251801 | -0.6463597 | 0.51804645 | 0.65891873 | 0.18116814    | no           |
| CD69      | 1516.25797 | 0.286078531    | 0.36403299 | -0.7858588 | 0.43195021 | 0.60000541 | 0.22184484    | no           |
| IL18R1    | 1253.08496 | 0.276143106    | 0.24269664 | -1.1378118 | 0.25519907 | 0.42290132 | 0.37370696    | no           |
| TNFSF13B  | 1863.35862 | 0.272824023    | 0.27245712 | -1.0013466 | 0.31665925 | 0.48846374 | 0.31116767    | no           |
| RG55      | 5353.96751 | 0.272693261    | 0.331521   | -0.822552  | 0.41076281 | 0.58392752 | 0.23364106    | no           |
| FCGR3B    | 2307.78612 | 0.258865367    | 0.48620922 | -0.5324156 | 0.5944382  | 0.72128484 | 0.1418932     | no           |
| CD3E      | 3772.72142 | 0.25585611     | 0.3414956  | -0.7492223 | 0.45372324 | 0.61774526 | 0.20919058    | no           |
| IL1R2     | 177.225688 | 0.254478739    | 0.49926909 | -0.5097026 | 0.61025985 | 0.72605935 | 0.13902788    | no           |
| JAK2      | 5120.8998  | 0.249018248    | 0.21399918 | -1.1636411 | 0.24456948 | 0.41564604 | 0.38127635    | no           |

|           |             |              |            |            |            |            |            |     |
|-----------|-------------|--------------|------------|------------|------------|------------|------------|-----|
| MMP1      | 1314.51458  | 0.244594878  | 0.38533706 | -0.6347557 | 0.52558779 | 0.66269765 | 0.17868457 | no  |
| MAF       | 9653.17113  | 0.241740252  | 0.25578591 | -0.9450882 | 0.34461384 | 0.51250264 | 0.29030389 | no  |
| TNFAIP3   | 7131.71415  | 0.229911582  | 0.26169584 | -0.878545  | 0.37964801 | 0.54734093 | 0.26174207 | no  |
| KLRB1     | 1985.69773  | 0.215872798  | 0.29544362 | -0.7306734 | 0.46497865 | 0.62482141 | 0.2042441  | no  |
| MMRN1     | 1987.36669  | 0.209470394  | 0.35410667 | -0.591546  | 0.55415462 | 0.68095272 | 0.16688304 | no  |
| MKI67     | 7800.26954  | 0.207285928  | 0.29121312 | -0.7118015 | 0.47658772 | 0.63628163 | 0.19635061 | no  |
| ABCC9     | 636.055213  | 0.206281516  | 0.30954416 | -0.6664042 | 0.5051528  | 0.65399247 | 0.18442725 | no  |
| GZMK      | 1222.45935  | 0.199227499  | 0.44570975 | -0.4469893 | 0.65488277 | 0.76433939 | 0.11671376 | no  |
| MCAM      | 3740.74407  | 0.182268832  | 0.28161011 | -0.6472382 | 0.51747777 | 0.65891873 | 0.18116814 | no  |
| TGFB1     | 20332.6947  | 0.165467989  | 0.44300208 | -0.3735151 | 0.70876507 | 0.80035742 | 0.09671603 | no  |
| JAK1      | 11059.4691  | 0.159933609  | 0.28179863 | -0.5675457 | 0.57034346 | 0.69788863 | 0.15621388 | no  |
| TYK2      | 5738.73775  | 0.130997963  | 0.21334874 | -0.6140086 | 0.53920964 | 0.67111193 | 0.17320027 | no  |
| NRG7      | 583.09906   | 0.128220446  | 0.38985349 | -0.3288939 | 0.74223587 | 0.82294613 | 0.08462859 | no  |
| TGFB1     | 4446.9934   | 0.115757565  | 0.1854311  | -0.6242619 | 0.53245563 | 0.66573551 | 0.17669828 | no  |
| CD59      | 17776.8393  | 0.114739025  | 0.36018975 | -0.3185516 | 0.75006655 | 0.82542311 | 0.08332337 | no  |
| LAMP3     | 3485.7638   | 0.111537098  | 0.2172795  | -0.5133347 | 0.60771725 | 0.72605935 | 0.13902788 | no  |
| PLVAP     | 5503.58908  | 0.100715693  | 0.29239391 | -0.3444521 | 0.73050632 | 0.81679119 | 0.08788896 | no  |
| IFITM2    | 2616.48229  | 0.099663191  | 0.25482371 | -0.3911064 | 0.69571856 | 0.79746397 | 0.09828893 | no  |
| MUC1      | 8206.29814  | 0.094807607  | 0.39581826 | -0.2395231 | 0.81070001 | 0.87075186 | 0.06010559 | no  |
| LYVE1     | 1537.22231  | 0.094490719  | 0.43618356 | -0.2166306 | 0.82849621 | 0.88008755 | 0.05547412 | no  |
| IRF8      | 4519.44282  | 0.091292825  | 0.25308109 | -0.3607256 | 0.7183046  | 0.80739664 | 0.09291306 | no  |
| CD8A      | 1127.59325  | 0.089263831  | 0.33926602 | -0.2631087 | 0.79246682 | 0.86170569 | 0.06464104 | no  |
| FXYD5     | 5369.07009  | 0.077229423  | 0.23600515 | -0.3272362 | 0.74348926 | 0.82294613 | 0.08462859 | no  |
| TUBB      | 8071.50028  | 0.072557631  | 0.19160592 | -0.3786816 | 0.70492434 | 0.80035742 | 0.09671603 | no  |
| TNF       | 1069.46083  | 0.068719602  | 0.41367144 | -0.1661212 | 0.86806156 | 0.91209367 | 0.03996056 | no  |
| KLF2      | 1876.11788  | 0.067079451  | 0.2926839  | -0.2291874 | 0.81872329 | 0.87612456 | 0.05743415 | no  |
| CYTH1     | 4619.9569   | 0.063904798  | 0.28387189 | -0.2251184 | 0.82188713 | 0.87627672 | 0.05735872 | no  |
| A2M       | 18885.8881  | 0.060866797  | 0.42583506 | -0.1429351 | 0.8663414  | 0.92460074 | 0.03404576 | no  |
| S100A4    | 1685.74879  | 0.05850637   | 0.23621184 | -0.247686  | 0.80437735 | 0.86717261 | 0.06189445 | no  |
| PDGFRA    | 6603.12943  | 0.051086071  | 0.28465802 | -0.1794647 | 0.85757282 | 0.90434952 | 0.04366369 | no  |
| NPC2      | 5980.98134  | 0.050343408  | 0.19638699 | -0.256348  | 0.79768215 | 0.86316352 | 0.06390692 | no  |
| SPINK1    | 10616.1579  | 0.04361875   | 0.47363258 | -0.0920941 | 0.9266233  | 0.94619985 | 0.02401712 | no  |
| ACKR1     | 1261.60761  | 0.03260274   | 0.34354704 | -0.0949004 | 0.92439396 | 0.94619985 | 0.02401712 | no  |
| STMN1     | 7112.84912  | 0.03235154   | 0.29810948 | -0.1085223 | 0.91358135 | 0.94284197 | 0.02556109 | no  |
| ZBTB16    | 709.078541  | 0.022426795  | 0.43009456 | -0.0521439 | 0.95841406 | 0.96506971 | 0.01544132 | no  |
| TPSB2     | 1488.32088  | 0.021534502  | 0.3587389  | -0.0600283 | 0.95213306 | 0.96506971 | 0.01544132 | no  |
| CD209     | 3280.26477  | 0.003264054  | 0.24106837 | -0.01354   | 0.98919701 | 0.98919701 | 0.0047172  | no  |
| CDH5      | 2144.0873   | -0.004045773 | 0.25734635 | 0.01572112 | 0.98745688 | 0.98919701 | 0.0047172  | no  |
| HMGB2     | 7935.80976  | -0.016049411 | 0.29463083 | 0.05447295 | 0.96555836 | 0.96506971 | 0.01544132 | no  |
| KIT       | 2108.29862  | -0.029515672 | 0.26991548 | 0.10935153 | 0.91292367 | 0.94284197 | 0.02556109 | no  |
| CSF3R     | 1189.80923  | -0.034883345 | 0.57737823 | 0.0604168  | 0.95182368 | 0.96506971 | 0.01544132 | no  |
| CD7       | 46.6169971  | -0.037133241 | 0.33447304 | 0.11102013 | 0.91160038 | 0.94284197 | 0.02556109 | no  |
| S1PR1     | 1096.0719   | -0.037891277 | 0.37594074 | 0.10079056 | 0.91971672 | 0.94580798 | 0.02419703 | no  |
| BATF      | 409.524264  | -0.045188924 | 0.21545566 | 0.20973654 | 0.8338733  | 0.88256664 | 0.05425249 | no  |
| CD14      | 5297.90012  | -0.045593991 | 0.2981742  | 0.15291058 | 0.87846879 | 0.91969657 | 0.03635544 | no  |
| TLE4      | 3245.07062  | -0.053038496 | 0.20247918 | 0.26194543 | 0.79336351 | 0.86170569 | 0.06464104 | no  |
| STAT4     | 1540.00042  | -0.095074739 | 0.23952759 | 0.39692605 | 0.69142199 | 0.79568404 | 0.09925935 | no  |
| LEF1      | 3583.37577  | -0.109466333 | 0.24323861 | 0.45003683 | 0.65268389 | 0.76433939 | 0.11671376 | no  |
| GZMA      | 1227.09625  | -0.121277875 | 0.32529856 | 0.37282021 | 0.70928226 | 0.80035742 | 0.09671603 | no  |
| TOP2A     | 3752.54684  | -0.132913266 | 0.24951889 | 0.53267818 | 0.59425638 | 0.72128484 | 0.1418932  | no  |
| CCL4      | 2162.1315   | -0.139184019 | 0.37279479 | 0.37335291 | 0.7088858  | 0.80035742 | 0.09671603 | no  |
| NOTCH4    | 739.349007  | -0.142234533 | 0.32222474 | 0.44141406 | 0.65891326 | 0.76433939 | 0.11671376 | no  |
| CPA3      | 3586.24516  | -0.146333261 | 0.24320614 | 0.60168408 | 0.54738445 | 0.67838243 | 0.16852541 | no  |
| TNFRSF11B | 1085.42105  | -0.150590658 | 0.33871685 | 0.44459157 | 0.65661494 | 0.76433939 | 0.11671376 | no  |
| UBE2C     | 1475.25515  | -0.153055307 | 0.24525749 | 0.62405966 | 0.53258841 | 0.66573551 | 0.17669828 | no  |
| CEACAM6   | 23845.8847  | -0.154245261 | 0.49276587 | 0.31301937 | 0.75426595 | 0.82542311 | 0.08332337 | no  |
| TPSAB1    | 676.972831  | -0.154742995 | 0.48903784 | 0.31642336 | 0.75168119 | 0.82542311 | 0.08332337 | no  |
| IGHA2     | 769.55433   | -0.172278342 | 0.36303966 | 0.47454414 | 0.63511193 | 0.74870919 | 0.12568864 | no  |
| GZMB      | 859.258529  | -0.185799038 | 0.4353451  | 0.42678564 | 0.66953546 | 0.77356687 | 0.11150214 | no  |
| TMEM176A  | 12356.3759  | -0.194352895 | 0.29780004 | 0.65262884 | 0.51399559 | 0.65891873 | 0.18116814 | no  |
| TIGIT     | 2064.10891  | -0.196532574 | 0.38319932 | 0.51287298 | 0.60804018 | 0.72605935 | 0.13902788 | no  |
| MS4A7     | 5283.47913  | -0.212709637 | 0.22244176 | 0.95624867 | 0.33894662 | 0.50929802 | 0.29302801 | no  |
| MYH11     | 20743.4326  | -0.214850742 | 0.62808348 | 0.34207354 | 0.73229555 | 0.81679119 | 0.08788896 | no  |
| CLEC10A   | 1867.66406  | -0.217331768 | 0.31241281 | 0.69565574 | 0.48664445 | 0.6428948  | 0.19186008 | no  |
| TMEM176B  | 19200.2275  | -0.229330042 | 0.33047035 | 0.69395042 | 0.4877133  | 0.6428948  | 0.19186008 | no  |
| POSTN     | 6799.184    | -0.241187528 | 0.37975855 | 0.63510757 | 0.52535826 | 0.66269765 | 0.17868457 | no  |
| CD86      | 2135.88046  | -0.248732818 | 0.3168324  | 0.78506119 | 0.43241769 | 0.60000541 | 0.22184484 | no  |
| TUBA1B    | 57892.879   | -0.249738573 | 0.3243354  | 0.77000098 | 0.44129931 | 0.60652512 | 0.21715121 | no  |
| ANXA2     | 51690.1993  | -0.251112634 | 0.35416556 | 0.70902613 | 0.47830826 | 0.63628163 | 0.19635061 | no  |
| GATA3     | 338.898803  | -0.256220104 | 0.34931743 | 0.7334879  | 0.46326091 | 0.62482141 | 0.2042441  | no  |
| APOE      | 2353.41664  | -0.276739333 | 0.37908991 | 0.73000976 | 0.46538422 | 0.62482141 | 0.2042441  | no  |
| CXCL14    | 8732.76611  | -0.277760178 | 0.46516198 | 0.59712571 | 0.55042346 | 0.67924597 | 0.16797293 | no  |
| TMS4F1    | 4506.98939  | -0.290386777 | 0.42434747 | 0.68431368 | 0.49377711 | 0.64794281 | 0.18846332 | no  |
| TNFRSF1A  | 6989.81671  | -0.294922097 | 0.31154763 | 0.94663567 | 0.34382446 | 0.51250264 | 0.29030389 | no  |
| FOXP3     | 506.931456  | -0.296153861 | 0.44051069 | 0.67229665 | 0.50139486 | 0.65203816 | 0.18572698 | no  |
| SELENOP   | 34314.82866 | -0.3299702   | 0.37567706 | 0.87833472 | 0.3797621  | 0.54734093 | 0.26174207 | no  |
| MUC2      | 12916.4213  | -0.334779382 | 0.65797631 | 0.50880157 | 0.61089132 | 0.72605935 | 0.13902788 | no  |
| LTBR      | 4714.62655  | -0.33737116  | 0.3301577  | 1.02184852 | 0.3068526  | 0.48116253 | 0.3177082  | no  |
| FCN1      | 684.105916  | -0.347226043 | 0.45306938 | 0.76638602 | 0.44344665 | 0.60660154 | 0.21709649 | no  |
| ACTG1     | 105448.403  | -0.357071893 | 0.2771673  | 1.28829013 | 0.19764499 | 0.35067859 | 0.45509075 | no  |
| AGR2      | 47284.3389  | -0.369422326 | 0.57093239 | 0.64705092 | 0.51759899 | 0.65891873 | 0.18116814 | no  |
| QDPR      | 2915.60647  | -0.369851475 | 0.21519058 | 1.71871593 | 0.08566611 | 0.19110132 | 0.71873631 | no  |
| DUSP23    | 915.194974  | -0.387868082 | 0.26902734 | 1.44174225 | 0.1493751  | 0.28312927 | 0.54801523 | no  |
| OSM       | 540.695673  | -0.38869551  | 0.57151941 | 0.68010902 | 0.49643543 | 0.64849674 | 0.18809221 | no  |
| TYROBP    | 1596.51563  | -0.394821971 | 0.33967168 | 1.16236351 | 0.24508784 | 0.41564604 | 0.38127635 | no  |
| IFNG      | 487.783311  | -0.395817413 | 0.37889083 | 1.04467405 | 0.29617364 | 0.47192503 | 0.32612698 | no  |
| TNFSF15   | 451.778802  | -0.426436468 | 0.37213241 | 1.14592671 | 0.25182548 | 0.4221352  | 0.37454844 | no  |
| S100A16   | 8527.96765  | -0.42647993  | 0.45902871 | 0.92909206 | 0.35284138 | 0.51941117 | 0.28448872 | no  |
| PROX1     | 1646.78975  | -0.43845515  | 0.2816277  | 1.5568609  | 0.11950352 | 0.2406668  | 0.61858381 | no  |
| LEFTY1    | 3988.95609  | -0.500070209 | 0.6139855  | 0.81446583 | 0.41537814 | 0.5876081  | 0.23091222 | no  |
| KLRK1     | 670.003887  | -0.51090705  | 0.28489865 | 1.79329404 | 0.07292592 | 0.17193916 | 0.7646252  | no  |
| S100B     | 1431.59288  | -0.530535892 | 0.23046795 | 2.30199424 | 0.0213355  | 0.07365826 | 1.13277853 | yes |
| HMG2      | 3212.0311   | -0.538534208 | 0.20022304 | 2.68967156 | 0.00715224 | 0.03703837 | 1.43134811 | yes |
| CRYAB     | 2098.64151  | -0.543559278 | 0.32490441 | 1.67298214 | 0.09433081 | 0.20121698 | 0.69633538 | no  |
| RTKN2     | 1858.83013  | -0.547455394 | 0.31950076 | 1.71347134 | 0.08662586 | 0.19176717 | 0.71722573 | no  |
| IL1RL1    | 1153.38695  | -0.549690879 | 0.25264318 | 2.17575983 | 0.02957322 | 0.08808589 | 1.05509365 | yes |
| FLT3      | 867.918626  | -0.566636898 | 0.36853436 | 1.51040707 | 0.13093959 | 0.25657081 | 0.59079275 | no  |
| KCNJ8     | 882.613362  | -0.566022534 | 0.40292067 | 1.40479896 | 0.16008107 | 0.29569115 | 0.52916168 | no  |
| XCR1      | 582.63967   |              |            |            |            |            |            |     |

|           |            |              |            |            |            |            |            |     |
|-----------|------------|--------------|------------|------------|------------|------------|------------|-----|
| MS4A2     | 1147.41002 | -0.589241169 | 0.27041282 | 2.179043   | 0.02932847 | 0.08808589 | 1.05509365 | yes |
| ASPN      | 1211.93258 | -0.596651486 | 0.40157785 | 1.48576791 | 0.13734052 | 0.26658722 | 0.57416068 | no  |
| TRGC2     | 1582.5655  | -0.601106693 | 0.26056558 | 2.30693053 | 0.02105869 | 0.07357857 | 1.13324868 | yes |
| APP       | 28138.247  | -0.616961251 | 0.35868978 | 1.72004135 | 0.08542493 | 0.19110132 | 0.71873631 | no  |
| IL13RA2   | 854.347269 | -0.621057006 | 0.52444508 | 1.18421744 | 0.236327   | 0.40553154 | 0.39197537 | no  |
| CST3      | 10473.5316 | -0.63099466  | 0.28715909 | 2.19736958 | 0.02799406 | 0.08675302 | 1.06171539 | yes |
| HAND2     | 636.828897 | -0.632897053 | 0.38077529 | 1.66212744 | 0.09648722 | 0.20130428 | 0.69614699 | no  |
| LILRA4    | 1838.12172 | -0.635626594 | 0.21497609 | 2.95673165 | 0.00310919 | 0.02422279 | 1.61577591 | yes |
| TREM1     | 1611.896   | -0.639966607 | 0.61534959 | 1.04000493 | 0.29833761 | 0.47277545 | 0.32534509 | no  |
| INSM1     | 994.016817 | -0.64477586  | 0.40269384 | 1.6011565  | 0.10934226 | 0.22174305 | 0.65414999 | no  |
| CPE       | 2511.08592 | -0.647535058 | 0.34588864 | 1.87209112 | 0.061194   | 0.1478855  | 0.83007441 | no  |
| GSN       | 26004.6796 | -0.64997153  | 0.37230866 | 1.74578675 | 0.08084802 | 0.18461358 | 0.73373636 | no  |
| IRF7      | 100.856079 | -0.655020781 | 0.35584164 | 1.84076484 | 0.06565603 | 0.15606761 | 0.80668723 | no  |
| TFF3      | 10832.0483 | -0.664245276 | 0.50813307 | 1.30722701 | 0.19113563 | 0.34324074 | 0.46440117 | no  |
| CXCR1     | 657.025772 | -0.670383819 | 0.63427229 | 1.05693379 | 0.29054181 | 0.46809513 | 0.32966588 | no  |
| CCL5      | 3433.52566 | -0.670668446 | 0.33106816 | 2.02577149 | 0.04278821 | 0.11695823 | 0.93196923 | no  |
| OGN       | 1294.86949 | -0.691371608 | 0.51448883 | 1.34380295 | 0.17901211 | 0.32445946 | 0.48883956 | no  |
| ADAMDEC1  | 10264.2272 | -0.693748814 | 0.47111741 | 1.4725561  | 0.14087077 | 0.27054651 | 0.56775806 | no  |
| PYY       | 288.419992 | -0.695341775 | 0.40813538 | 1.70370375 | 0.08843645 | 0.19429219 | 0.71154465 | no  |
| TNFRSF11A | 7263.14539 | -0.719036375 | 0.43020082 | 1.67139704 | 0.09464328 | 0.20121698 | 0.69633538 | no  |
| NUPR1     | 5388.12845 | -0.756354225 | 0.30258011 | 2.49968257 | 0.01243046 | 0.05224398 | 1.28196379 | yes |
| LTA       | 791.260317 | -0.771573334 | 0.53706366 | 1.43665154 | 0.15081703 | 0.28318704 | 0.54792662 | no  |
| KLRC2     | 1351.28228 | -0.808269276 | 0.32462583 | 2.48984893 | 0.01277974 | 0.05294464 | 1.27617801 | yes |
| SOX6      | 1718.78727 | -0.8100739   | 0.26147542 | 3.09808816 | 0.00194774 | 0.01662429 | 1.77925689 | yes |
| PLAC8     | 26890.5595 | -0.819407735 | 0.41563114 | 1.97147823 | 0.0486692  | 0.12703782 | 0.89606698 | no  |
| WFD2C2    | 1460.19394 | -0.82854165  | 0.64409398 | 1.28636764 | 0.19831479 | 0.35067859 | 0.45509075 | no  |
| TRGC1     | 907.388359 | -0.831968936 | 0.35601342 | 2.33690332 | 0.01944421 | 0.06961508 | 1.15729668 | yes |
| ITLN1     | 13676.6227 | -0.841688292 | 0.65713417 | 1.28084695 | 0.20024743 | 0.35195003 | 0.45351899 | no  |
| SOX8      | 492.621655 | -0.850512269 | 0.42612964 | 1.99590028 | 0.04594478 | 0.12253574 | 0.91173722 | no  |
| CCSER1    | 2486.56767 | -0.851418043 | 0.28903669 | 2.94570926 | 0.00322215 | 0.02422279 | 1.61577591 | yes |
| ITM2C     | 59915.0621 | -0.862029806 | 0.44197187 | 1.95041779 | 0.05112634 | 0.13005824 | 0.88586212 | no  |
| TRDC      | 982.418259 | -0.86215405  | 0.3107555  | 2.77438066 | 0.00553069 | 0.03047716 | 1.51602555 | yes |
| S1PR5     | 221.729939 | -0.863489115 | 0.56294302 | 1.53388367 | 0.12505827 | 0.24840342 | 0.60484243 | no  |
| NEUROD1   | 791.465371 | -0.878235624 | 0.43429266 | 2.02222074 | 0.04315355 | 0.11695823 | 0.93196923 | no  |
| GLIS3     | 1096.79648 | -0.878573281 | 0.31693667 | 2.77207833 | 0.00556996 | 0.03047716 | 1.51602555 | yes |
| FABP5     | 12212.1062 | -0.879388743 | 0.28386724 | 3.09788739 | 0.00194906 | 0.01662429 | 1.77925689 | yes |
| ADGRB3    | 556.980907 | -0.8804005   | 0.37013578 | 2.37858797 | 0.01737909 | 0.06379666 | 1.19520207 | yes |
| ASCL2     | 1023.18462 | -0.896728423 | 0.42958023 | 2.08745271 | 0.03684723 | 0.10579898 | 0.97551852 | no  |
| TNFSF9    | 233.517645 | -0.920825108 | 0.43441774 | 2.11967657 | 0.03403333 | 0.09969359 | 1.00133275 | no  |
| CSPG4     | 2330.574   | -0.920839821 | 0.40632897 | 2.2662421  | 0.02343656 | 0.07723413 | 1.11219073 | yes |
| CCL8      | 795.427419 | -0.92668492  | 0.3822066  | 2.42456543 | 0.01532672 | 0.05698396 | 1.24424735 | yes |
| SOX9      | 4574.56688 | -0.928899879 | 0.4656432  | 1.99487479 | 0.04605654 | 0.12253574 | 0.91173722 | no  |
| INAVA     | 4294.78486 | -0.93599246  | 0.41195267 | 2.27208739 | 0.02308123 | 0.07723413 | 1.11219073 | yes |
| TPH1      | 2162.42886 | -0.95446585  | 0.42009332 | 2.27203293 | 0.02308452 | 0.07723413 | 1.11219073 | yes |
| TRAV1-2   | 415.503525 | -0.979896722 | 0.44623069 | 2.19594204 | 0.02809609 | 0.08675302 | 1.06171539 | no  |
| TINAGL1   | 3562.7049  | -0.988860877 | 0.37468292 | 2.6391939  | 0.00831034 | 0.04155172 | 1.38141102 | yes |
| FCER1A    | 1467.9427  | -0.996139113 | 0.40953658 | 2.43235685 | 0.01500092 | 0.05649697 | 1.24797484 | yes |
| IL10      | 695.611225 | -0.998995837 | 0.45218367 | 2.20927007 | 0.02715586 | 0.08654066 | 1.0627798  | yes |
| CLEC9A    | 681.956717 | -1.010777522 | 0.38547552 | 2.62215753 | 0.0087375  | 0.04294705 | 1.36706665 | yes |
| FOLR3     | 190.086772 | -1.028690102 | 0.58152192 | 1.76896186 | 0.07690024 | 0.17699262 | 0.75204485 | no  |
| LGR5      | 1818.8912  | -1.038843835 | 0.50935902 | 2.03951202 | 0.04139895 | 0.11559921 | 0.93704514 | no  |
| MGLL      | 6414.94017 | -1.040525273 | 0.36287338 | 2.86746101 | 0.0041378  | 0.02926735 | 1.5336166  | yes |
| CCL23     | 584.543271 | -1.055967304 | 0.32774724 | 3.22189537 | 0.00127346 | 0.01407847 | 1.85144466 | yes |
| NCAM1     | 1040.62283 | -1.072975749 | 0.31516595 | 3.40447861 | 0.00066291 | 0.00873829 | 2.05857345 | yes |
| RORC      | 2441.77639 | -1.076352143 | 0.32447686 | 3.31719228 | 0.00090927 | 0.01098702 | 1.95912028 | yes |
| CD8B      | 1926.92698 | -1.076930465 | 0.43470723 | 2.47736957 | 0.01323548 | 0.05401369 | 1.26749616 | yes |
| HPGDS     | 935.045685 | -1.081433936 | 0.30848182 | 3.5056651  | 0.00045547 | 0.00733809 | 2.13441673 | yes |
| CEACAM1   | 21259.322  | -1.083730291 | 0.49452612 | 2.19145209 | 0.02841909 | 0.08675302 | 1.06171539 | yes |
| TRGV9     | 716.779404 | -1.083847352 | 0.38261772 | 2.83271603 | 0.00461544 | 0.03002352 | 1.52253846 | yes |
| GATA2     | 2043.52493 | -1.09515286  | 0.31568336 | 3.46922079 | 0.00052197 | 0.00796692 | 2.09870982 | yes |
| PLP1      | 686.667114 | -1.110634786 | 0.35401713 | 3.13723458 | 0.0017055  | 0.01630356 | 1.78771753 | yes |
| CACNA1A   | 960.236156 | -1.12006772  | 0.44448851 | 2.51990252 | 0.01173873 | 0.05039473 | 1.2976149  | yes |
| NTRK2     | 1115.41481 | -1.134323876 | 0.43789356 | 2.59041006 | 0.00958617 | 0.04585076 | 1.33865343 | yes |
| TRDV2     | 198.094352 | -1.154833903 | 0.47369223 | 2.4379414  | 0.01477117 | 0.05649697 | 1.24797484 | no  |
| PHLDA2    | 358.524149 | -1.21110305  | 0.37839647 | 3.20095766 | 0.00136972 | 0.01418635 | 1.84812933 | yes |
| KRT8      | 97907.0904 | -1.255598483 | 0.43175457 | 2.90813017 | 0.00363597 | 0.02636078 | 1.57904176 | yes |
| C7        | 2206.58325 | -1.259853661 | 0.53363456 | 2.36089218 | 0.01823103 | 0.06608748 | 1.17988078 | yes |
| IL32      | 5750.57097 | -1.301140683 | 0.32410249 | 4.01459635 | 5.95E-05   | 0.00255326 | 2.59290428 | yes |
| EPCAM     | 57971.1687 | -1.312016935 | 0.52085126 | 2.51898584 | 0.01176934 | 0.05039473 | 1.2976149  | yes |
| MS4A8     | 1287.98924 | -1.313573162 | 0.4702177  | 2.79354257 | 0.00521342 | 0.03002352 | 1.52253846 | yes |
| C15orf48  | 26739.1836 | -1.314316204 | 0.52205713 | 2.51757161 | 0.0118167  | 0.05039473 | 1.2976149  | yes |
| IGHE      | 97.0412267 | -1.326356501 | 0.74521104 | 1.77984011 | 0.07510213 | 0.17564208 | 0.75537142 | no  |
| DUSP1     | 7987.84709 | -1.334020115 | 0.54240834 | 2.4594388  | 0.01391544 | 0.05528052 | 1.25742785 | yes |
| CA4       | 10499.4036 | -1.355132063 | 0.70416733 | 1.92444609 | 0.05429869 | 0.1345865  | 0.8709985  | no  |
| TREM2     | 853.424568 | -1.374656617 | 0.51063852 | 2.69203472 | 0.00710176 | 0.03703837 | 1.43134811 | yes |
| PIGR      | 117128.085 | -1.374798454 | 0.54046775 | 2.54371966 | 0.01096791 | 0.04893374 | 1.3103916  | yes |
| LGALS4    | 94777.0134 | -1.376957257 | 0.62043026 | 2.21935866 | 0.02646233 | 0.08526752 | 1.06921636 | yes |
| CLDN5     | 889.083778 | -1.413466752 | 0.43983701 | 3.21361484 | 0.00131075 | 0.01407847 | 1.85144466 | yes |
| PHGR1     | 74019.8639 | -1.506143806 | 0.61823876 | 2.43618471 | 0.0148431  | 0.05649697 | 1.24797484 | yes |
| SH2D6     | 207.044499 | -1.565720391 | 0.45609034 | 3.43291721 | 0.00059712 | 0.008246   | 2.08375646 | no  |
| FABP2     | 5896.1976  | -1.61008423  | 0.56715757 | 2.83886579 | 0.00452742 | 0.03002352 | 1.52253846 | yes |
| JUN       | 13975.4846 | -1.68586719  | 0.40952534 | 4.11663711 | 3.84E-05   | 0.00255326 | 2.59290428 | yes |
| FABP1     | 63313.6438 | -1.777128568 | 0.69163101 | 2.56947498 | 0.01018528 | 0.0468846  | 1.3289698  | yes |
| TRPM5     | 803.841932 | -1.778431142 | 0.45782584 | 3.8845146  | 0.00010254 | 0.00270318 | 2.56812455 | yes |
| CA7       | 1298.27157 | -1.821126865 | 0.55630216 | 3.273629   | 0.00106176 | 0.01231641 | 1.909516   | no  |
| MTG1      | 237.253781 | -1.935739452 | 0.53328129 | 3.62986566 | 0.00028357 | 0.00513968 | 2.28906358 | yes |
| DDC       | 5190.05703 | -1.958693357 | 0.49628768 | 3.94668944 | 7.92E-05   | 0.00255326 | 2.59290428 | yes |
| OTOP2     | 738.768648 | -1.964202761 | 0.66756758 | 2.94232798 | 0.00325755 | 0.02422279 | 1.61577591 | yes |
| BEST4     | 551.312459 | -2.154949713 | 0.53770077 | 4.00771177 | 6.13E-05   | 0.00255326 | 2.59290428 | yes |
| LYPD8     | 8786.16714 | -2.365349345 | 0.6323874  | 3.74034861 | 0.00018377 | 0.00363757 | 2.43918912 | yes |
| SLC26A2   | 20711.8808 | -2.627487213 | 0.67124898 | 3.91432583 | 9.07E-05   | 0.00262906 | 2.5802     | yes |
| GUCA2A    | 1260.16858 | -2.809367372 | 0.73362335 | 3.82944106 | 0.00012844 | 0.00310384 | 2.50810109 | yes |
| AQP8      | 10362.8134 | -2.971248595 | 0.99182156 | 2.99574914 | 0.00273772 | 0.02218742 | 1.65389322 | yes |

Supplementary Table 4. Pseudobulk DE gene analysis of Xenium data comparing colon biopsies in UC PRE versus HC. Significance was set as log2fc >0.4 or <-0.4, p-adj < 0.1 and baseMean >500.











|          |            |             |            |            |           |           |            |    |
|----------|------------|-------------|------------|------------|-----------|-----------|------------|----|
| FTSW     | 438.26084  | -0.1812835  | 0.0092747  | 1.7056493  | 0.0870048 | 0.2781989 | 0.5593046  | no |
| FDCA     | 435.02041  | -0.11913491 | 0.0271288  | 1.8164545  | 0.1059915 | 0.3090325 | 0.5726382  | no |
| PFZ      | 421.85338  | -0.11946157 | 0.0644165  | 1.8545495  | 0.0935652 | 0.2821914 | 0.6491898  | no |
| ELPDA    | 467.82247  | -0.11951208 | 0.0749045  | 1.4825254  | 0.0178520 | 0.1800744 | 1.0478260  | no |
| FFN      | 347.55617  | -0.11966877 | 0.07351573 | 1.62779156 | 0.1015690 | 0.3038074 | 0.51732841 | no |
| AEI      | 365.55997  | -0.12047212 | 0.0594585  | 1.5948176  | 0.0712639 | 0.2422222 | 0.5203261  | no |
| PHRD     | 548.58147  | -0.1213665  | 0.07113551 | 1.7051247  | 0.0878448 | 0.2791699 | 0.5530345  | no |
| TN048    | 614.48481  | -0.12198811 | 0.0895241  | 1.481051   | 0.0207285 | 0.1394923 | 1.0470333  | no |
| CLL2     | 390.36429  | -0.1222584  | 0.0739717  | 1.6222603  | 0.0841433 | 0.2464466 | 0.4670333  | no |
| MMZ      | 360.69683  | -0.1225054  | 0.0642459  | 1.3072044  | 0.1989962 | 0.4242217 | 0.3794276  | no |
| PRF8     | 437.77984  | -0.1246841  | 0.068162   | 1.2664704  | 0.0388321 | 0.1762227 | 0.7447469  | no |
| RNA      | 538.82042  | -0.1242208  | 0.0691432  | 1.7951484  | 0.0724271 | 0.2474234 | 0.6075209  | no |
| CA1      | 588.70748  | -0.1244497  | 0.0749448  | 1.6514446  | 0.0807260 | 0.2474462 | 0.5305802  | no |
| ALC      | 440.00084  | -0.1246524  | 0.0623264  | 1.2007842  | 0.0444724 | 0.1904496 | 0.7168922  | no |
| CLL81    | 414.42031  | -0.1250433  | 0.0526462  | 0.9173471  | 0.0374682 | 0.1864008 | 0.9640030  | no |
| FLD      | 464.87342  | -0.1256718  | 0.0738738  | 1.7011488  | 0.0891768 | 0.2813801 | 0.5569947  | no |
| E1A      | 524.69643  | -0.1259077  | 0.0762965  | 1.7519242  | 0.0218151 | 0.1462268 | 0.8251028  | no |
| EFN45    | 419.18943  | -0.1262033  | 0.0714855  | 1.7814974  | 0.0779754 | 0.2444424 | 0.5843204  | no |
| COL8A    | 255.8204   | -0.1262042  | 0.0723976  | 1.741204   | 0.0814444 | 0.262778  | 0.5825207  | no |
| TEP1     | 566.6267   | -0.1262364  | 0.0742688  | 1.736622   | 0.028471  | 0.1407119 | 0.8541464  | no |
| KJK      | 431.07888  | -0.1264745  | 0.0502203  | 1.4875305  | 0.1387870 | 0.3612087 | 0.4471801  | no |
| CSDE     | 585.88962  | -0.1265407  | 0.0733468  | 1.6832638  | 0.0285755 | 0.1320703 | 0.8459786  | no |
| RKX      | 538.62916  | -0.12628078 | 0.0672493  | 1.908728   | 0.0555637 | 0.2142203 | 0.66913704 | no |
| NDF4A2   | 470.24504  | -0.1268470  | 0.0574845  | 1.3335345  | 0.0171311 | 0.1121528 | 0.94064943 | no |
| NLRP3    | 387.81816  | -0.1289200  | 0.0584212  | 1.2871485  | 0.0288848 | 0.1478719 | 0.8304117  | no |
| COE      | 355.01918  | -0.1295107  | 0.0484463  | 1.2428165  | 0.1740071 | 0.141225  | 0.3841281  | no |
| IFP2     | 418.91515  | -0.1297144  | 0.0818833  | 1.5886717  | 0.1120781 | 0.132615  | 0.4952829  | no |
| BEK      | 448.70005  | -0.1311224  | 0.0816833  | 1.4823962  | 0.1348178 | 0.1883257 | 0.4464628  | no |
| TNFRSF14 | 665.07723  | -0.1322691  | 0.107033   | 1.2867765  | 0.1212078 | 0.4820135 | 0.4681629  | no |
| TNFRSF4  | 509.18427  | -0.1322426  | 0.0647632  | 1.9058946  | 0.0947887 | 0.2142203 | 0.66913704 | no |
| E1B      | 514.78229  | -0.1324762  | 0.0707351  | 1.3050193  | 0.1708615 | 0.1807768 | 0.8096903  | no |
| TNFRSF1A | 670.31241  | -0.1324754  | 0.0900126  | 1.3384774  | 0.1802404 | 0.1430034 | 0.88412814 | no |
| APC1     | 670.81892  | -0.1328724  | 0.054446   | 1.5487796  | 0.1160151 | 0.1387762 | 0.4700819  | no |
| EFN82    | 331.12378  | -0.1329129  | 0.0507313  | 1.4188122  | 0.1568103 | 0.1807768 | 0.8096903  | no |
| TGFB1    | 548.5125   | -0.1331473  | 0.0811288  | 1.5491963  | 0.1212415 | 0.1406006 | 0.4477402  | no |
| TEP2     | 517.76962  | -0.1347818  | 0.081622   | 1.3662891  | 0.1172427 | 0.1601168 | 0.4480916  | no |
| PCPFA    | 530.26681  | -0.1349566  | 0.1034011  | 1.5006512  | 0.1593246 | 0.442137  | 0.3724765  | no |
| TEP4     | 381.02369  | -0.13689105 | 0.0747107  | 1.6022084  | 0.062474  | 0.2088077 | 0.6471047  | no |
| DOC      | 584.72187  | -0.1362854  | 0.084674   | 1.6648488  | 0.0496927 | 0.2069074 | 0.5241168  | no |
| FLN      | 535.55071  | -0.1369438  | 0.0592651  | 1.4869349  | 0.0142828 | 0.0895716 | 1.0479292  | no |
| WIF1     | 565.11970  | -0.1370255  | 0.0679238  | 1.2558326  | 0.0434343 | 0.178477  | 0.47441712 | no |
| FALP3    | 1650.48138 | -0.1370255  | 0.0785208  | 1.7793488  | 0.0751765 | 0.230032  | 0.6200754  | no |
| INH      | 586.96754  | -0.1407403  | 0.0695111  | 1.3247808  | 0.0110048 | 0.1424684 | 0.9400703  | no |
| COL3A3   | 445.87371  | -0.1420757  | 0.0730458  | 1.7766487  | 0.0737227 | 0.250032  | 0.6200754  | no |
| ACT1     | 402.34027  | -0.1420989  | 0.0730458  | 1.7766487  | 0.0737227 | 0.250032  | 0.6200754  | no |
| FAM2P    | 412.34473  | -0.14118673 | 0.0730458  | 1.7766487  | 0.0737227 | 0.250032  | 0.6200754  | no |
| ITAC     | 488.07018  | -0.1418164  | 0.0696847  | 1.2027114  | 0.024084  | 0.1384484 | 0.8173038  | no |
| MFSD9    | 527.51678  | -0.1423573  | 0.0707011  | 2.0071041  | 0.0448815 | 0.1917681 | 0.7117688  | no |
| IL1RA    | 475.61481  | -0.1430949  | 0.0739972  | 1.9512048  | 0.0512256 | 0.2044201 | 0.6884917  | no |
| ICM1     | 621.74248  | -0.1444774  | 0.0726718  | 1.8815031  | 0.0468461 | 0.1633234 | 0.7822329  | no |
| ATA      | 478.85858  | -0.14484075 | 0.0596972  | 1.5983919  | 0.0012871 | 0.0781093 | 1.0732168  | no |
| AB2      | 608.22556  | -0.14411808 | 0.0748025  | 1.6244243  | 0.0417821 | 0.1248411 | 0.8727033  | no |
| HBR2     | 402.34033  | -0.1472608  | 0.0482397  | 1.7584887  | 0.0737915 | 0.250032  | 0.6200754  | no |
| IL13     | 467.82247  | -0.1485487  | 0.0695111  | 1.3247808  | 0.0110048 | 0.1424684 | 0.9400703  | no |
| DMRT     | 621.80949  | -0.1490242  | 0.074203   | 2.4001008  | 0.0018884 | 0.0781093 | 1.0732168  | no |
| IL10P1   | 578.7042   | -0.1491361  | 0.0818833  | 1.5886717  | 0.1120781 | 0.132615  | 0.4952829  | no |
| MTFR     | 373.29207  | -0.1491848  | 0.0414458  | 1.8181874  | 0.0813346 | 0.2343335 | 0.6307251  | no |
| MBP      | 448.80884  | -0.1512741  | 0.0837204  | 2.2119118  | 0.0209903 | 0.1440331 | 0.8462822  | no |
| ITGB2    | 474.47171  | -0.1515237  | 0.0262964  | 1.2618185  | 0.0488817 | 0.1644156 | 0.80180714 | no |
| FRF2     | 588.85781  | -0.1517129  | 0.0713481  | 1.8789527  | 0.0308289 | 0.1711548 | 0.74913504 | no |
| MLL2     | 312.14533  | -0.1521222  | 0.0607133  | 1.8713283  | 0.0420727 | 0.2881328 | 0.54462208 | no |
| NLRP2    | 393.96287  | -0.1522833  | 0.0635362  | 1.7850453  | 0.0475292 | 0.250032  | 0.6200754  | no |
| E1T      | 477.23337  | -0.1538816  | 0.0696277  | 1.1023897  | 0.0185513 | 0.1448819 | 0.83204945 | no |
| IL1RL1   | 282.15151  | -0.1538833  | 0.0739629  | 1.9064154  | 0.0462009 | 0.1633234 | 0.7822329  | no |
| IL1RD3   | 324.44677  | -0.1540728  | 0.0695111  | 1.3247808  | 0.0110048 | 0.1424684 | 0.9400703  | no |
| TNFRSF3  | 370.34441  | -0.15399152 | 0.0695111  | 1.3247808  | 0.0110048 | 0.1424684 | 0.9400703  | no |
| NLRP1    | 399.18165  | -0.1547409  | 0.0542519  | 1.810249   | 0.0718671 | 0.2413191 | 0.6174738  | no |
| MSC1     | 467.2358   | -0.1560278  | 0.0460542  | 1.4307765  | 0.015068  | 0.0696842 | 1.0120847  | no |
| ABL1     | 483.88816  | -0.1560288  | 0.0292144  | 1.4939184  | 0.0138471 | 0.080718  | 1.0478042  | no |
| EFNB4    | 434.01338  | -0.15692078 | 0.0707565  | 1.2520712  | 0.0242674 | 0.1334484 | 0.81473004 | no |
| PLTGL2   | 448.07778  | -0.1568813  | 0.0709114  | 0.9179668  | 0.0171481 | 0.1791638 | 0.9433068  | no |
| NTRK2    | 248.21481  | -0.1600864  | 0.0788828  | 1.2039815  | 0.0437020 | 0.1917681 | 0.7117688  | no |
| SPRY3    | 493.47028  | -0.1605783  | 0.0618251  | 1.8464508  | 0.0623134 | 0.2207144 | 0.64832069 | no |
| FZD5     | 714.71084  | -0.1610252  | 0.1092134  | 1.4426014  | 0.0211694 | 0.1460309 | 0.8303477  | no |
| EFNB1    | 488.49946  | -0.1622881  | 0.0414458  | 1.8181874  | 0.0813346 | 0.2343335 | 0.6307251  | no |
| CELSR2   | 447.02715  | -0.1625734  | 0.061320   | 1.5745465  | 0.0100312 | 0.0603174 | 0.9682523  | no |
| LYN      | 507.8622   | -0.1631177  | 0.0642134  | 1.4006606  | 0.0107079 | 0.085718  | 1.0478042  | no |
| LEP11    | 717.51281  | -0.1644268  | 0.1492627  | 1.129186   | 0.286651  | 0.6881777 | 0.3024863  | no |
| HEP1     | 503.71012  | -0.16451813 | 0.0592651  | 1.7782891  | 0.0758884 | 0.250032  | 0.6200754  | no |
| AEI2     | 567.2415   | -0.16451813 | 0.0592651  | 1.7782891  | 0.0758884 | 0.250032  | 0.6200754  | no |
| APC2     | 372.20204  | -0.1658843  | 0.0076201  | 1.8991766  | 0.0833968 | 0.2818721 | 0.5503248  | no |
| ACE      | 389.19398  | -0.1668710  | 0.020787   | 1.4031615  | 0.071823  | 0.1786071 | 1.13746432 | no |
| ELANE    | 686.27418  | -0.1688712  | 0.0460436  | 1.6058197  | 0.0018113 | 0.0781093 | 1.0732168  | no |
| PRN13    | 520.50978  | -0.1698712  | 0.0460436  | 1.6058197  | 0.0018113 | 0.0781093 | 1.0732168  | no |
| SCY4     | 296.79017  | -0.1678462  | 0.0284111  | 1.6038197  | 0.0738275 | 0.2413191 | 0.6174738  | no |
| PCP      | 578.8422   | -0.1684194  | 0.0826232  | 1.4282499  | 0.0151285 | 0.0826232 | 1.0212847  | no |
| SPR      | 443.62843  | -0.1685008  | 0.0414458  | 1.8181874  | 0.0813346 | 0.2343335 | 0.6307251  | no |
| IL13RA2  | 443.62843  | -0.1685008  | 0.0414458  | 1.8181874  | 0.0813346 | 0.2343335 | 0.6307251  | no |
| IL13RA1  | 443.62843  | -0.1685008  | 0.0414458  | 1.8181874  | 0.0813346 | 0.2343335 | 0.6307251  | no |
| IL13RA3  | 443.62843  | -0.1685008  | 0.0414458  | 1.8181874  | 0.0813346 | 0.2343335 | 0.6307251  | no |
| IL13RA4  | 443.62843  | -0.1685008  | 0.0414458  | 1.8181874  | 0.0813346 | 0.2343335 | 0.6307251  | no |
| IL13RA5  | 443.62843  | -0.1685008  | 0.0414458  | 1.8181874  | 0.0813346 | 0.2343335 | 0.6307251  | no |
| IL13RA6  | 443.62843  | -0.1685008  | 0.0414458  | 1.8181874  | 0.0813346 | 0.2343335 | 0.6307251  | no |
| IL13RA7  | 443.62843  | -0.1685008  | 0.0414458  | 1.8181874  | 0.0813346 | 0.2343335 | 0.6307251  | no |
| IL13RA8  | 443.62843  | -0.1685008  | 0.0414458  | 1.8181874  | 0.0813346 | 0.2343335 | 0.6307251  | no |
| IL13RA9  | 443.62843  | -0.1685008  | 0.0414458  | 1.8181874  | 0.0813346 | 0.2343335 | 0.6307251  | no |
| IL13RA10 | 443.62843  | -0.1685008  | 0.0414458  | 1.8181874  | 0.0813346 | 0.2343335 | 0.6307251  | no |
| IL13RA11 | 443.62843  | -0.1685008  | 0.0414458  | 1.8181874  | 0.0813346 | 0.2343335 | 0.6307251  | no |
| IL13RA12 | 443.62843  | -0.1685008  | 0.0414458  | 1.8181874  | 0.0813346 | 0.2343335 | 0.6307251  | no |
| IL13RA13 | 443.62843  | -0.1685008  | 0.0414458  | 1.8181874  | 0.0813346 | 0.2343335 | 0.6307251  | no |
| IL13RA14 | 443.62843  | -0.1685008  | 0.0414458  | 1.8181874  | 0.0813346 | 0.2343335 | 0.6307251  | no |
| IL13RA15 | 443.62843  | -0.1685008  | 0.0414458  | 1.8181874  | 0.0813346 | 0.2343335 | 0.6307251  | no |
| IL13RA16 | 443.62843  | -0.1685008  | 0.0414458  | 1.8181874  | 0.0813346 | 0.2343335 | 0.6307251  | no |
| IL13RA17 | 443.62843  | -0.1685008  | 0.0414458  | 1.8181874  | 0.0813346 | 0.2343335 | 0.6307251  | no |
| IL13RA18 | 443.62843  | -0.1685008  | 0.0414458  | 1.8181874  | 0.0813346 | 0.2343335 | 0.6        |    |

|           | baseMean   | log2FoldChange | lfcSE      | stat       | pvalue     | padj       | $-\log_{10}(q\text{-value})$ | Significance |
|-----------|------------|----------------|------------|------------|------------|------------|------------------------------|--------------|
| MMP1      | 4356.24289 | 3.41523231     | 0.97080174 | 3.51795035 | 0.00043489 | 0.01709684 | 1.76708418                   | yes          |
| MMP3      | 1673.18929 | 2.7423359      | 1.04598916 | 2.6217632  | 0.00874762 | 0.0626411  | 1.20314041                   | yes          |
| MS4A1     | 5393.16287 | 2.57076258     | 0.95200461 | 2.70036778 | 0.00692629 | 0.05783023 | 1.23784507                   | yes          |
| BANK1     | 4178.99064 | 2.22221574     | 0.74315608 | 2.99024095 | 0.00278757 | 0.03562572 | 1.4482364                    | yes          |
| CD19      | 3401.9927  | 2.08618451     | 0.74763838 | 2.79036573 | 0.00526485 | 0.05089358 | 1.29333699                   | yes          |
| CCR7      | 1745.05622 | 2.05465648     | 0.81784489 | 2.51228136 | 0.01199534 | 0.076209   | 1.11799376                   | yes          |
| CXCR5     | 1502.46352 | 2.00830911     | 0.81341173 | 2.46899454 | 0.01354933 | 0.07918847 | 1.10133805                   | yes          |
| FCCR2     | 1164.9854  | 1.96605834     | 0.74627599 | 2.63449228 | 0.00842632 | 0.06264113 | 1.20314041                   | yes          |
| SELL      | 2560.14415 | 1.81666133     | 0.73396255 | 2.47514171 | 0.01331833 | 0.07918847 | 1.10133805                   | yes          |
| ZBTB16    | 709.078541 | 1.7551234      | 0.53162473 | 3.30143296 | 0.00096192 | 0.02363953 | 1.62636116                   | yes          |
| CD1C      | 870.394762 | 1.73887084     | 0.64302203 | 2.7042166  | 0.00684656 | 0.05783023 | 1.23784507                   | yes          |
| IL1R2     | 177.225688 | 1.73802411     | 0.68142389 | 2.55057703 | 0.01075448 | 0.07088177 | 1.14946544                   | no           |
| IGHD      | 555.95821  | 1.63342091     | 0.96545353 | 1.69186902 | 0.09067095 | 0.26282945 | 0.58032597                   | no           |
| OSM       | 540.695673 | 1.51049856     | 0.80321953 | 1.88055507 | 0.06003247 | 0.19343795 | 0.71345831                   | no           |
| CCR6      | 1063.59855 | 1.43849137     | 0.52601261 | 2.73470892 | 0.00624355 | 0.05658214 | 1.24732067                   | yes          |
| LTB       | 1866.54329 | 1.43458494     | 0.70964458 | 2.02155414 | 0.04322243 | 0.15657365 | 0.80528132                   | no           |
| LTA       | 791.260317 | 1.43269229     | 0.74761231 | 1.91635728 | 0.05531963 | 0.18025499 | 0.7441127                    | no           |
| CD69      | 1516.25796 | 1.43060727     | 0.4711908  | 3.03615282 | 0.00239618 | 0.03474459 | 1.45911277                   | yes          |
| TREM1     | 1611.896   | 1.39068068     | 0.85440512 | 1.62765957 | 0.10359709 | 0.27861496 | 0.55499557                   | no           |
| DUSP1     | 7987.84709 | 1.35970994     | 0.74104759 | 1.83484835 | 0.06652816 | 0.20308597 | 0.69232008                   | no           |
| S1PR1     | 1096.07189 | 1.31159152     | 0.51232586 | 2.56007283 | 0.01046502 | 0.07057062 | 1.15133027                   | yes          |
| PTGDS     | 7751.66235 | 1.30609567     | 0.84667142 | 1.54262402 | 0.12292203 | 0.2921917  | 0.53433212                   | no           |
| FOLR3     | 190.086772 | 1.2929175      | 0.86339402 | 1.49748258 | 0.13426774 | 0.3018422  | 0.52022005                   | no           |
| S100A12   | 414.708353 | 1.26764323     | 0.87080574 | 1.45571299 | 0.14547198 | 0.32128204 | 0.49311355                   | no           |
| CLU       | 5555.10391 | 1.25462836     | 0.64012069 | 1.95998721 | 0.04999729 | 0.17201781 | 0.7644266                    | no           |
| ALOX5AP   | 1967.02909 | 1.25363105     | 0.42166159 | 2.97307384 | 0.00294834 | 0.03562572 | 1.4482364                    | yes          |
| C3        | 8969.74854 | 1.24566561     | 0.76643811 | 1.62526574 | 0.10410595 | 0.27861496 | 0.55499557                   | no           |
| S1PR5     | 221.729939 | 1.19289581     | 0.8343949  | 1.42965377 | 0.15281642 | 0.33300625 | 0.47754761                   | no           |
| S100A8    | 1912.86507 | 1.18893337     | 1.01388688 | 1.17264894 | 0.24093662 | 0.41344153 | 0.3835859                    | no           |
| TRDV2     | 198.094352 | 1.15827169     | 0.70533365 | 1.64216139 | 0.10055656 | 0.27510757 | 0.56049745                   | no           |
| IL3RA     | 870.508282 | 1.15489548     | 0.35083364 | 3.2918607  | 0.00099527 | 0.02363953 | 1.62636116                   | yes          |
| ICOS      | 712.357049 | 1.14549785     | 0.43328483 | 2.64375248 | 0.00819926 | 0.06257329 | 1.203611                     | yes          |
| CXCR1     | 657.025771 | 1.11373192     | 0.89532389 | 1.24394305 | 0.21352052 | 0.40050485 | 0.39739222                   | no           |
| CTLA4     | 1716.01121 | 1.10990554     | 0.54576565 | 2.03366689 | 0.04198519 | 0.15657365 | 0.80528132                   | no           |
| CD28      | 1851.17888 | 1.10502101     | 0.53587772 | 2.0620768  | 0.03920042 | 0.1525121  | 0.8166957                    | no           |
| FLT3      | 867.918626 | 1.08780692     | 0.51245277 | 2.12274569 | 0.03377517 | 0.13773601 | 0.86095251                   | no           |
| IL10      | 695.611225 | 1.06027296     | 0.66311524 | 1.59892715 | 0.10983679 | 0.27861496 | 0.55499557                   | no           |
| CD7       | 46.6169971 | 1.05645492     | 0.45127521 | 2.34104353 | 0.01922993 | 0.09962906 | 1.00161399                   | no           |
| HAND2     | 636.828897 | 1.04846807     | 0.49761037 | 2.10700608 | 0.03511705 | 0.1395061  | 0.85540681                   | no           |
| TNF       | 1069.46083 | 1.03661032     | 0.55798183 | 1.85778509 | 0.06319954 | 0.19713568 | 0.70523476                   | no           |
| ITGAX     | 3566.65599 | 1.03480904     | 0.34736542 | 2.97902146 | 0.00289171 | 0.03562572 | 1.4482364                    | yes          |
| TNFSF9    | 233.517645 | 1.03395086     | 0.64472639 | 1.60370489 | 0.10877912 | 0.27861496 | 0.55499557                   | no           |
| GZMK      | 1222.45935 | 1.00616956     | 0.64451838 | 1.56111849 | 0.1184958  | 0.28636484 | 0.54308031                   | no           |
| ABCC9     | 636.055213 | 0.99795395     | 0.42726247 | 2.33569301 | 0.01950725 | 0.09962906 | 1.00161399                   | yes          |
| CD80      | 589.995259 | 0.99615144     | 0.45187814 | 2.20446922 | 0.02749136 | 0.12457024 | 0.90458571                   | no           |
| IL7R      | 6618.94046 | 0.99241457     | 0.51755142 | 1.9175188  | 0.05517206 | 0.18025499 | 0.7441127                    | no           |
| KLF2      | 1876.11788 | 0.97479619     | 0.39898545 | 2.44318732 | 0.01455818 | 0.0827818  | 1.08206513                   | yes          |
| GATA3     | 338.898803 | 0.96339833     | 0.50006999 | 1.92650897 | 0.05404085 | 0.18025499 | 0.7441127                    | no           |
| IL18R1    | 1253.08496 | 0.95463137     | 0.29733514 | 3.21062405 | 0.00132447 | 0.04006003 | 1.61967957                   | yes          |
| PTPRC     | 13970.3792 | 0.94880185     | 0.51384207 | 1.84648536 | 0.06482176 | 0.19998204 | 0.69900901                   | no           |
| CDB8      | 1926.92689 | 0.93983684     | 0.64191522 | 1.46411364 | 0.1431629  | 0.31936339 | 0.49571487                   | no           |
| TNFRSF13B | 1217.16313 | 0.93819237     | 0.56730659 | 1.65376602 | 0.09817506 | 0.27510757 | 0.56049745                   | no           |
| ACKR1     | 1261.60761 | 0.92205745     | 0.49366497 | 1.86777978 | 0.06179277 | 0.19692202 | 0.70570571                   | no           |
| JAK3      | 4521.55009 | 0.9179017      | 0.57851788 | 1.58664362 | 0.11259338 | 0.27907762 | 0.554275                     | no           |
| TREM2     | 853.425468 | 0.89808523     | 0.75314965 | 1.19243929 | 0.23308904 | 0.41144595 | 0.38568721                   | no           |
| IL1B      | 1957.75188 | 0.8847266      | 0.82825214 | 1.06818511 | 0.28543702 | 0.45987076 | 0.33736421                   | no           |
| TRAC      | 6948.11473 | 0.87758204     | 0.62512999 | 1.4038393  | 0.16036671 | 0.3384902  | 0.4704539                    | no           |
| TNFSF15   | 451.778802 | 0.87166786     | 0.50703726 | 1.71913967 | 0.08558894 | 0.25071509 | 0.60081953                   | no           |
| CCL4      | 2162.1315  | 0.85204854     | 0.53312085 | 1.59822775 | 0.1099923  | 0.27861496 | 0.55499557                   | no           |
| TIGIT     | 2064.10891 | 0.84057996     | 0.52106889 | 1.61318394 | 0.10670455 | 0.27861496 | 0.55499557                   | no           |
| IFNG      | 487.783311 | 0.83190631     | 0.54705245 | 1.52070665 | 0.12833347 | 0.29773365 | 0.52617208                   | no           |
| ADGRB3    | 556.980907 | 0.83071509     | 0.54559302 | 1.5225911  | 0.12786104 | 0.29773365 | 0.52617208                   | no           |
| FCN1      | 684.105916 | 0.81193855     | 0.64093968 | 1.26679401 | 0.20522895 | 0.40050485 | 0.39739222                   | no           |
| MMRN1     | 1987.36669 | 0.80819908     | 0.50039553 | 1.61512049 | 0.10628461 | 0.27861496 | 0.55499557                   | no           |
| TRAV1-2   | 415.503525 | 0.80491034     | 0.66661089 | 1.20746653 | 0.22725253 | 0.41144595 | 0.38568721                   | no           |
| KCNJ8     | 882.613362 | 0.78018257     | 0.60164458 | 1.29674995 | 0.19471724 | 0.38915281 | 0.40987983                   | no           |
| SERPINF1  | 6266.924   | 0.76678158     | 0.35341939 | 2.16960813 | 0.03003655 | 0.12810694 | 0.89242734                   | no           |
| NOTCH4    | 739.349007 | 0.76655003     | 0.46664964 | 1.64266713 | 0.10045182 | 0.27510757 | 0.56049745                   | no           |
| CCDC80    | 3139.17565 | 0.76099121     | 0.64354512 | 1.1824986  | 0.23700792 | 0.41144595 | 0.38568721                   | no           |
| SOX8      | 492.621655 | 0.75053481     | 0.63652724 | 1.1791087  | 0.23835489 | 0.41144595 | 0.38568721                   | no           |
| CLEC9A    | 681.956717 | 0.74862995     | 0.57308031 | 1.30632642 | 0.19144157 | 0.38554206 | 0.41392824                   | no           |
| RTKN2     | 1858.83013 | 0.73032349     | 0.46440622 | 1.57259627 | 0.11581233 | 0.28462353 | 0.5457292                    | no           |
| LYVE1     | 1537.22231 | 0.70698892     | 0.56229526 | 1.25732683 | 0.20863531 | 0.40050485 | 0.39739222                   | no           |
| CD3E      | 3772.72142 | 0.7020892      | 0.49637746 | 1.41442604 | 0.15723685 | 0.33528446 | 0.47458658                   | no           |
| STAT4     | 1540.00042 | 0.69899308     | 0.33006453 | 2.11774669 | 0.03419653 | 0.13773601 | 0.86095251                   | no           |
| PYY       | 288.419992 | 0.68242214     | 0.61560274 | 1.10854304 | 0.26762736 | 0.4460456  | 0.35062074                   | no           |
| NTRK2     | 1115.41481 | 0.68076118     | 0.63520649 | 1.07171636 | 0.28384745 | 0.45986458 | 0.33737004                   | no           |
| BASP1     | 4239.58352 | 0.67774494     | 0.40166368 | 1.68734437 | 0.09153715 | 0.26282945 | 0.58032597                   | no           |
| CSPG4     | 2330.574   | 0.66435397     | 0.604946   | 1.09820376 | 0.27211553 | 0.4509343  | 0.34588673                   | no           |
| CD40      | 2964.34461 | 0.6577479      | 0.43156979 | 1.52408234 | 0.12748814 | 0.29773365 | 0.52617208                   | no           |
| FYB1      | 3987.67501 | 0.65261179     | 0.53160444 | 1.22762668 | 0.21958714 | 0.40050485 | 0.39739222                   | no           |
| MT1G      | 237.253781 | 0.63545611     | 0.80697033 | 0.78745907 | 0.43101318 | 0.61765959 | 0.20925081                   | no           |
| TIMP1     | 4973.32528 | 0.62874391     | 0.77036966 | 0.81615871 | 0.41440937 | 0.60089358 | 0.22120243                   | no           |
| IRF8      | 4519.44282 | 0.61888905     | 0.34025876 | 1.81887763 | 0.0689301  | 0.20822635 | 0.68146431                   | no           |
| CDH5      | 2144.0873  | 0.60618286     | 0.37617423 | 1.61144178 | 0.10708347 | 0.27861496 | 0.55499557                   | no           |
| XCR1      | 582.639676 | 0.5999356      | 0.50622852 | 1.18510826 | 0.23597465 | 0.41144595 | 0.38568721                   | no           |
| CD3D      | 2876.52694 | 0.59369513     | 0.50158145 | 1.18364651 | 0.23655302 | 0.41144595 | 0.38568721                   | no           |
| TRGC1     | 907.388359 | 0.5845915      | 0.53969721 | 1.08318422 | 0.27872666 | 0.45410523 | 0.34284349                   | no           |
| CD86      | 2135.89046 | 0.58200204     | 0.42572694 | 1.36707823 | 0.17160079 | 0.35054231 | 0.45537107                   | no           |
| SH2D6     | 207.044499 | 0.56380102     | 0.70582219 | 0.7987862  | 0.42441439 | 0.61233917 | 0.21300796                   | no           |
| NEUROD1   | 791.465371 | 0.56028891     | 0.62252389 | 0.90002796 | 0.36810537 | 0.56184504 | 0.25038345                   | no           |
| FXYD5     | 5369.07009 | 0.55419012     | 0.31682914 | 1.74917659 | 0.0802605  | 0.23750556 | 0.62432622                   | no           |
| S100A9    | 3473.14706 | 0.53585536     | 0.96858096 | 0.55323756 | 0.58010075 | 0.75007895 | 0.12489302                   | no           |
| NOTCH3    | 2021.86666 | 0.52916021     | 0.37108326 | 1.42598783 | 0.15387185 | 0.33300625 | 0.47754761                   | no           |
| KLRF1     | 670.003887 | 0.52592936     | 0.41736479 | 1.26011913 | 0.20762639 | 0.40050485 | 0.39739222                   | no           |
| CLDN5     | 889.083778 | 0.52139784     | 0.67144331 | 0.77653293 | 0.43743439 | 0.61880962 | 0.20844294                   | no           |
| CSF3R     | 1189.80923 | 0.51914081     | 0.78815178 | 0.65868126 | 0.51010047 | 0.69125764 | 0.16036005                   | no           |
| LEF1      | 3583.37577 | 0.48364171     | 0.34012302 | 1.42196113 | 0.15503754 | 0.3330436  | 0.47749891                   | no</         |



|           |            |            |            |            |             |            |            |    |
|-----------|------------|------------|------------|------------|-------------|------------|------------|----|
| CACNA1A   | 960.236156 | 0.48163638 | 0.65663091 | 0.73349636 | 0.46325575  | 0.64279505 | 0.19192747 | no |
| IGHE      | 97.0412267 | 0.47857994 | 1.06351777 | 0.44999713 | 0.65271251  | 0.80206198 | 0.09579207 | no |
| TRGV9     | 716.779404 | 0.45828269 | 0.58639262 | 0.78152875 | 0.43449158  | 0.61765959 | 0.20925081 | no |
| TNFSF13B  | 1863.35862 | 0.4570269  | 0.39421808 | 1.15932508 | 0.2463237   | 0.41774195 | 0.37909191 | no |
| MRC1      | 3356.91078 | 0.45282759 | 0.50084353 | 0.90412987 | 0.36592654  | 0.56147459 | 0.25066989 | no |
| ZFP36L1   | 12275.9423 | 0.43886158 | 0.59282452 | 0.74028917 | 0.45912455  | 0.64012557 | 0.19373482 | no |
| CRYAB     | 2098.64151 | 0.43353543 | 0.41901327 | 1.034658   | 0.30082866  | 0.48199067 | 0.31696137 | no |
| TRGC2     | 1582.5655  | 0.42894772 | 0.39474646 | 1.0866411  | 0.27719545  | 0.45410523 | 0.34284349 | no |
| IL1R1     | 6092.98725 | 0.40521105 | 0.43358735 | 0.93455458 | 0.3500179   | 0.5428085  | 0.26535336 | no |
| OSMR      | 2661.85795 | 0.39047101 | 0.3266134  | 1.19551433 | 0.23188614  | 0.41144595 | 0.38568721 | no |
| CCSER1    | 2486.56767 | 0.37726307 | 0.42810619 | 0.88123713 | 0.37818948  | 0.5712237  | 0.24319378 | no |
| VWF       | 2640.62439 | 0.36738076 | 0.4452452  | 0.82512008 | 0.40930342  | 0.59647232 | 0.2244097  | no |
| FOXP3     | 506.931456 | 0.36732149 | 0.63264665 | 0.58061082 | 0.56150278  | 0.73622147 | 0.13299152 | no |
| CCL23     | 584.543271 | 0.36214927 | 0.50250257 | 0.72069139 | 0.47109941  | 0.6474826  | 0.1887719  | no |
| CYTH1     | 4619.9569  | 0.35658088 | 0.42331242 | 0.84235866 | 0.39958722  | 0.58525401 | 0.2326556  | no |
| IL1RL1    | 1153.38695 | 0.34880068 | 0.38443592 | 0.90730512 | 0.36424547  | 0.56147459 | 0.25066989 | no |
| VCAN      | 4267.30924 | 0.33719796 | 0.53011325 | 0.63608665 | 0.52471994  | 0.70776178 | 0.15011289 | no |
| TGFBR2    | 7579.67825 | 0.33570305 | 0.44261746 | 0.75844965 | 0.44818185  | 0.63093561 | 0.20001496 | no |
| ALOX5     | 3354.62151 | 0.33357323 | 0.4450963  | 0.74944058 | 0.4535917   | 0.63546663 | 0.19690725 | no |
| TNFAIP3   | 7131.71415 | 0.32997486 | 0.37882781 | 0.87104181 | 0.38373132  | 0.5765911  | 0.23913206 | no |
| CD8A      | 1127.59325 | 0.32053351 | 0.51971139 | 0.61675291 | 0.53739772  | 0.71818128 | 0.14376592 | no |
| FCGR3B    | 2307.78612 | 0.29779736 | 0.66919248 | 0.44501002 | 0.65631251  | 0.8025054  | 0.09555204 | no |
| NFKBIA    | 6678.05303 | 0.28819199 | 0.50063273 | 0.57565551 | 0.56484805  | 0.73622147 | 0.13299152 | no |
| CD1D      | 1611.36803 | 0.26645507 | 0.26290255 | 1.01351267 | 0.31081535  | 0.49525522 | 0.30517094 | no |
| TRDC      | 982.418259 | 0.2577235  | 0.46832779 | 0.5503058  | 0.58210965  | 0.75007895 | 0.12489302 | no |
| CD79A     | 6817.54988 | 0.24730059 | 0.76989811 | 0.3212121  | 0.74804966  | 0.86428049 | 0.06334529 | no |
| HPGDS     | 935.045685 | 0.24320181 | 0.45826619 | 0.53069989 | 0.59562676  | 0.7561008  | 0.1214203  | no |
| KLRB1     | 1985.69773 | 0.24102815 | 0.45473205 | 0.53004435 | 0.59608118  | 0.7561008  | 0.1214203  | no |
| TNFRSF1B  | 5545.37429 | 0.23719667 | 0.35329017 | 0.67139335 | 0.50196998  | 0.68343331 | 0.16530386 | no |
| MCAM      | 3740.74407 | 0.2158931  | 0.41229661 | 0.5236354  | 0.60053215  | 0.7561008  | 0.1214203  | no |
| CD4       | 3278.25061 | 0.21539046 | 0.37351612 | 0.57665641 | 0.56417159  | 0.73622147 | 0.13299152 | no |
| COL1A2    | 24033.8077 | 0.21354201 | 0.60721746 | 0.35167303 | 0.72508349  | 0.84447474 | 0.07341333 | no |
| GLIS3     | 1096.79648 | 0.20364274 | 0.48740297 | 0.41781186 | 0.67608468  | 0.8113261  | 0.09080455 | no |
| BATF      | 409.524264 | 0.20095653 | 0.32287329 | 0.62240061 | 0.53367848  | 0.71651278 | 0.14477606 | no |
| GATA2     | 2043.52493 | 0.1980654  | 0.48013069 | 0.41252393 | 0.67995544  | 0.81146946 | 0.09072782 | no |
| MEF2C     | 3166.64943 | 0.19467715 | 0.3740221  | 0.52049639 | 0.60271764  | 0.7561008  | 0.1214203  | no |
| C7        | 2206.58324 | 0.18843596 | 0.74359751 | 0.25341123 | 0.79995045  | 0.88760144 | 0.051782   | no |
| S100B     | 1431.59288 | 0.18807367 | 0.35793906 | 0.5254349  | 0.5992809   | 0.7561008  | 0.1214203  | no |
| COL1A1    | 27985.0535 | 0.18546701 | 0.61483639 | 0.30165263 | 0.76291689  | 0.86763097 | 0.06166495 | no |
| FCER1G    | 6285.04915 | 0.17552422 | 0.5462375  | 0.32133316 | 0.74795793  | 0.86428049 | 0.06334529 | no |
| SPARC     | 16800.0697 | 0.17186035 | 0.66376984 | 0.25891557 | 0.79570038  | 0.88760144 | 0.051782   | no |
| IL10RA    | 5656.27472 | 0.16564736 | 0.4637217  | 0.35721287 | 0.72093245  | 0.84447474 | 0.07341333 | no |
| LILRA4    | 1838.12172 | 0.15420247 | 0.33349447 | 0.46238389 | 0.64380605  | 0.79448406 | 0.09991481 | no |
| GZMB      | 859.258529 | 0.15061619 | 0.59322533 | 0.25389373 | 0.79957766  | 0.88760144 | 0.051782   | no |
| CTSL      | 5683.08235 | 0.13764451 | 0.44727845 | 0.30773786 | 0.75828181  | 0.86763097 | 0.06166495 | no |
| COL6A2    | 9314.92282 | 0.13700599 | 0.66664261 | 0.20551639 | 0.83716869  | 0.90252387 | 0.0445413  | no |
| LAMP3     | 3485.7638  | 0.13614552 | 0.30942409 | 0.43999651 | 0.65993963  | 0.8025054  | 0.09555204 | no |
| COL3A1    | 35487.2811 | 0.13468081 | 0.62056665 | 0.21702876 | 0.82818593  | 0.90252387 | 0.0445413  | no |
| TNFRSF11B | 1906.35102 | 0.13279169 | 0.77956772 | 0.17034015 | 0.86474264  | 0.91523856 | 0.03846569 | no |
| SPARCL1   | 10113.9213 | 0.12963438 | 0.56263457 | 0.23040601 | 0.8177763   | 0.90044036 | 0.04554505 | no |
| APOE      | 2353.41664 | 0.12448485 | 0.54618643 | 0.22791641 | 0.81971122  | 0.90044036 | 0.04554505 | no |
| OGN       | 1294.86949 | 0.1142031  | 0.69220798 | 0.1649838  | 0.868895674 | 0.91538724 | 0.03839515 | no |
| FCGR3A    | 1237.2805  | 0.10894855 | 0.52753492 | 0.20652387 | 0.83638172  | 0.90252387 | 0.0445413  | no |
| NKG7      | 583.099906 | 0.10144009 | 0.56068765 | 0.18092086 | 0.85642969  | 0.90976048 | 0.04107293 | no |
| MAF       | 9653.17113 | 0.09874499 | 0.39358458 | 0.25088633 | 0.80190199  | 0.88760144 | 0.051782   | no |
| CCL8      | 795.427419 | 0.09578607 | 0.59076391 | 0.16213934 | 0.87119613  | 0.91538724 | 0.03839515 | no |
| HMGB2     | 7935.80976 | 0.09423443 | 0.45260241 | 0.20820577 | 0.8350683   | 0.90252387 | 0.0445413  | no |
| TGFBR1    | 4446.99339 | 0.08257963 | 0.28164549 | 0.29320415 | 0.76936611  | 0.87154755 | 0.05970892 | no |
| TYROBP    | 1596.51563 | 0.06204919 | 0.49520551 | 0.12529988 | 0.90028615  | 0.93243922 | 0.03037947 | no |
| IRF7      | 100.856079 | 0.05514205 | 0.52970716 | 0.10409912 | 0.91709069  | 0.94310745 | 0.02543883 | no |
| TCF4      | 2331.13703 | 0.04918573 | 0.44556827 | 0.11038877 | 0.91210106  | 0.94131426 | 0.02626536 | no |
| CLEC10A   | 867.66406  | 0.04373027 | 0.48071185 | 0.09096982 | 0.92751657  | 0.95045868 | 0.02206676 | no |
| ASP1      | 1211.93258 | 0.00630214 | 0.48591406 | 0.01296965 | 0.98965201  | 0.99706356 | 0.00127716 | no |
| HMG2      | 32112.0311 | -0.0016114 | 0.29878793 | -0.0053931 | 0.99569694  | 0.99706356 | 0.00127716 | no |
| KLRC2     | 1351.28228 | -0.001848  | 0.50213533 | -0.0036803 | 0.99706356  | 0.99706356 | 0.00127716 | no |
| TYK2      | 5738.37775 | -0.0037923 | 0.32210166 | -0.0117737 | 0.99060615  | 0.99706356 | 0.00127716 | no |
| LST1      | 515.700859 | -0.0069104 | 0.40282372 | -0.017155  | 0.98631298  | 0.99706356 | 0.00127716 | no |
| TRPM5     | 803.841932 | -0.0183568 | 0.70743955 | -0.0259483 | 0.97929859  | 0.99647927 | 0.00153173 | no |
| PLP1      | 686.667113 | -0.026776  | 0.53483156 | -0.0500643 | 0.96007117  | 0.98035436 | 0.00861691 | no |
| RGCC      | 1611.68025 | -0.0466933 | 0.34133816 | -0.1367948 | 0.89119301  | 0.92889968 | 0.03203118 | no |
| PDGFRA    | 6603.12943 | -0.0586203 | 0.43855306 | -0.1336674 | 0.89366556  | 0.92889968 | 0.03203118 | no |
| TLE4      | 3245.07062 | -0.0782954 | 0.29311465 | -0.2671154 | 0.78938028  | 0.88760144 | 0.051782   | no |
| TPSB2     | 1488.32088 | -0.0801921 | 0.54909061 | -0.1460453 | 0.88388559  | 0.92536759 | 0.03368572 | no |
| NCAM1     | 1040.62283 | -0.083402  | 0.43981902 | -0.189628  | 0.84960061  | 0.9061102  | 0.04281898 | no |
| JAK2      | 5120.8998  | -0.0853257 | 0.32079826 | -0.2659794 | 0.79025505  | 0.88760144 | 0.051782   | no |
| GZMA      | 1227.09625 | -0.0934198 | 0.49353847 | -0.1892857 | 0.84986888  | 0.9061102  | 0.04281898 | no |
| HLA-DRA   | 16413.3057 | -0.1051219 | 0.54481295 | -0.1929505 | 0.84699772  | 0.9061102  | 0.04281898 | no |
| PECAM1    | 9946.17504 | -0.1106539 | 0.49996844 | -0.2213219 | 0.82484183  | 0.90252387 | 0.0445413  | no |
| TOP2A     | 3752.54684 | -0.1131834 | 0.37517189 | -0.3016841 | 0.7628929   | 0.86763097 | 0.06166495 | no |
| IFITM2    | 2616.48229 | -0.1324943 | 0.37363635 | -0.3546076 | 0.72288358  | 0.84447474 | 0.07341333 | no |
| S100A4    | 1685.74879 | -0.1386095 | 0.36706203 | -0.3776186 | 0.70571394  | 0.83533487 | 0.07813939 | no |
| MSA47     | 5283.47913 | -0.1636338 | 0.34295521 | -0.4771287 | 0.63327051  | 0.78482242 | 0.1052286  | no |
| TUBB      | 8071.50028 | -0.1658269 | 0.28901687 | -0.5737619 | 0.56612893  | 0.73622147 | 0.13299152 | no |
| CPA3      | 3586.24516 | -0.177941  | 0.35609713 | -0.499698  | 0.61728773  | 0.76829803 | 0.11447028 | no |
| JAK1      | 11059.4691 | -0.1796985 | 0.43143981 | -0.4165089 | 0.67703764  | 0.8113261  | 0.09080455 | no |
| CCL5      | 3433.52566 | -0.1812969 | 0.50719924 | -0.3574471 | 0.72075711  | 0.84447474 | 0.07341333 | no |
| CD14      | 5297.90012 | -0.1987213 | 0.45767114 | -0.4342011 | 0.6641424   | 0.8025054  | 0.09555204 | no |
| MSA42     | 1147.41002 | -0.2076834 | 0.40140225 | -0.5173947 | 0.60488064  | 0.7561008  | 0.1214203  | no |
| IL13RA2   | 854.347269 | -0.2370598 | 0.76736994 | -0.308925  | 0.75737855  | 0.86763097 | 0.06166495 | no |
| PLVAP     | 5503.58908 | -0.2435467 | 0.44543707 | -0.546759  | 0.58454429  | 0.75007895 | 0.12489302 | no |
| CD44      | 22491.6211 | -0.255122  | 0.43907643 | -0.5810424 | 0.56121191  | 0.73622147 | 0.13299152 | no |
| PHLDA2    | 358.524149 | -0.2586657 | 0.59073371 | -0.4378719 | 0.66147912  | 0.8025054  | 0.09555204 | no |
| TGFBI     | 20332.6947 | -0.266264  | 0.67572625 | -0.3940412 | 0.69355064  | 0.82430199 | 0.08391365 | no |
| QDPR      | 2915.60647 | -0.2706092 | 0.31640799 | -0.855254  | 0.39241056  | 0.58406564 | 0.23353834 | no |
| TPH1      | 2162.42886 | -0.3166271 | 0.53314998 | -0.5938799 | 0.55259241  | 0.7351     | 0.13365358 | no |
| CPE       | 2511.08592 | -0.3550456 | 0.41644344 | -0.8525661 | 0.39389996  | 0.58406564 | 0.23353834 | no |
| NPC2      | 5980.98134 | -0.4386594 | 0.28939611 | -1.5157749 | 0.12957628  | 0.29823112 | 0.52544703 | no |
| CAV1      | 3118.44421 | -0.443147  | 0.46202055 | -0.9591501 | 0.33748315  | 0.52902765 | 0.27652163 | no |
| UBE2C     | 1475.25515 | -0.4443065 | 0.35905932 | -1.2374181 | 0.21593189  | 0.40050485 | 0.39739222 | no |

|           |            |            |            |            |            |            |            |     |
|-----------|------------|------------|------------|------------|------------|------------|------------|-----|
| INSM1     | 994.016817 | -0.4670687 | 0.55342088 | -0.8439665 | 0.39868813 | 0.58525401 | 0.2326556  | no  |
| KIT       | 2108.29862 | -0.4674724 | 0.38820587 | -1.2041869 | 0.22851733 | 0.41144595 | 0.38568721 | no  |
| RORC      | 2441.77639 | -0.4745409 | 0.4373544  | -1.0850261 | 0.2779101  | 0.45410523 | 0.34284349 | no  |
| SOX6      | 1718.78727 | -0.475219  | 0.38243505 | -1.2426137 | 0.21401024 | 0.40050485 | 0.39739222 | no  |
| WNT5A     | 3349.41961 | -0.4762339 | 0.60852428 | -0.7826045 | 0.43385938 | 0.61765959 | 0.20925081 | no  |
| PROX1     | 1646.78975 | -0.4777906 | 0.4259989  | -1.1215772 | 0.26204226 | 0.43926159 | 0.35727677 | no  |
| POSTN     | 6799.184   | -0.4916098 | 0.57765857 | -0.8510388 | 0.39474781 | 0.58406564 | 0.23353834 | no  |
| CD209     | 3280.26477 | -0.4918763 | 0.35589109 | -1.3820978 | 0.16694168 | 0.3482956  | 0.45805201 | no  |
| RG55      | 5353.96751 | -0.4959407 | 0.49747498 | -0.9969158 | 0.31880538 | 0.50246501 | 0.29889418 | no  |
| TNMIN1    | 7112.84912 | -0.5074335 | 0.44907573 | -1.1299508 | 0.25849698 | 0.43583793 | 0.36067498 | no  |
| FABP5     | 12212.1062 | -0.5161133 | 0.40971007 | -1.2597038 | 0.20777625 | 0.40050485 | 0.39739222 | no  |
| MKI67     | 7800.26954 | -0.5165899 | 0.41812996 | -1.2354769 | 0.21665308 | 0.40050485 | 0.39739222 | no  |
| TPSAB1    | 676.972831 | -0.5360763 | 0.74382342 | -0.7207037 | 0.47109183 | 0.6474826  | 0.1887719  | no  |
| ACTG1     | 105448.403 | -0.5449691 | 0.41089417 | -1.3263003 | 0.18474025 | 0.37464806 | 0.42637651 | no  |
| CALD1     | 12046.6369 | -0.5498026 | 0.58381599 | -0.9417395 | 0.34632603 | 0.53997068 | 0.26762982 | no  |
| BEST4     | 551.312459 | -0.5546551 | 0.80119155 | -0.6922877 | 0.48875666 | 0.66858222 | 0.17484518 | no  |
| HLA-DRB1  | 9531.98169 | -0.592694  | 0.66348814 | -0.8933    | 0.37169654 | 0.564356   | 0.24844685 | no  |
| AZM       | 18885.8881 | -0.618585  | 0.61342017 | -1.0084197 | 0.313253   | 0.49641187 | 0.30415785 | no  |
| APP       | 28138.247  | -0.6676403 | 0.53447921 | -1.2491418 | 0.21161323 | 0.40050485 | 0.39739222 | no  |
| IGHA2     | 769.55433  | -0.6717744 | 0.54433867 | -1.2341112 | 0.21716148 | 0.40050485 | 0.39739222 | no  |
| CD59      | 17776.8393 | -0.6730311 | 0.53961026 | -1.247254  | 0.21230437 | 0.40050485 | 0.39739222 | no  |
| CCL20     | 1862.03197 | -0.7007523 | 0.51243115 | -1.3675052 | 0.17146701 | 0.35045231 | 0.45537107 | no  |
| TNFRSF1A  | 6989.81671 | -0.7081066 | 0.45589296 | -1.55323   | 0.12036819 | 0.28848575 | 0.53987564 | no  |
| DUSP23    | 915.194974 | -0.7205409 | 0.38787857 | -1.8576455 | 0.06321937 | 0.19713568 | 0.70523476 | no  |
| TM4SF1    | 4506.98939 | -0.7409377 | 0.63388519 | -1.1688831 | 0.24245074 | 0.41359244 | 0.38342741 | no  |
| S100A11   | 10790.127  | -0.7597886 | 0.50691505 | -1.4988481 | 0.13391305 | 0.3018422  | 0.52022005 | no  |
| TUBA1B    | 57892.8789 | -0.7720671 | 0.4602516  | -1.6774892 | 0.09344686 | 0.26568225 | 0.57563746 | no  |
| FCER1A    | 1467.9427  | -0.7747403 | 0.59905614 | -1.2932682 | 0.19591831 | 0.38915281 | 0.40987983 | no  |
| MZB1      | 15536.3626 | -0.7918994 | 0.64361794 | -1.2303874 | 0.21855209 | 0.40050485 | 0.39739222 | no  |
| F3        | 7352.51271 | -0.798783  | 0.67128762 | -1.1899265 | 0.23407527 | 0.41144595 | 0.38568721 | no  |
| C1QA      | 3218.33667 | -0.8074313 | 0.5083546  | -1.5883231 | 0.1122133  | 0.27907762 | 0.554275   | no  |
| SEC61B    | 2324.72837 | -0.8806766 | 0.56268317 | -1.5651376 | 0.11755066 | 0.28636484 | 0.54308031 | no  |
| PLAC8     | 26890.5595 | -0.8917227 | 0.61373416 | -1.4529461 | 0.14623872 | 0.32128204 | 0.49311355 | no  |
| ASCL2     | 1023.18462 | -0.8928285 | 0.63706736 | -1.4014664 | 0.16107465 | 0.3384902  | 0.4704539  | no  |
| IL32      | 5750.57097 | -0.9293315 | 0.46063413 | -2.0175047 | 0.04364287 | 0.15657365 | 0.80528132 | no  |
| NUPR1     | 5388.12845 | -0.9567296 | 0.40986472 | -2.3342571 | 0.01958226 | 0.09962906 | 1.00161399 | yes |
| GSN       | 26004.6796 | -0.9808445 | 0.49027272 | -2.0006099 | 0.04543444 | 0.15874684 | 0.7992949  | no  |
| TMEM176A  | 12356.3759 | -0.9871753 | 0.40027204 | -2.4662609 | 0.01365318 | 0.07918847 | 1.10133805 | yes |
| LTBR      | 4714.62655 | -1.0182869 | 0.4645796  | -2.191846  | 0.02839063 | 0.12520291 | 0.90236374 | no  |
| ANXA2     | 51690.1993 | -1.0272292 | 0.5093755  | -2.0166444 | 0.04373264 | 0.15657365 | 0.80528132 | no  |
| JUN       | 13975.4846 | -1.0465046 | 0.54545081 | -1.9186049 | 0.05503435 | 0.18025499 | 0.7441127  | no  |
| C1QB      | 2214.65925 | -1.047101  | 0.58023684 | -1.8046097 | 0.07113579 | 0.212674   | 0.6722856  | no  |
| TINAGL1   | 3562.7049  | -1.0591709 | 0.5142761  | -2.0595374 | 0.03944278 | 0.1525121  | 0.8166957  | no  |
| CST3      | 10473.5316 | -1.0633765 | 0.36108145 | -2.9449768 | 0.00322979 | 0.03624763 | 1.44072037 | yes |
| MGLL      | 6414.94017 | -1.0875673 | 0.50196453 | -2.1666218 | 0.0302637  | 0.12810694 | 0.89242734 | no  |
| LYZ       | 27013.2345 | -1.0986711 | 0.54005673 | -2.0343623 | 0.04191508 | 0.15657365 | 0.80528132 | no  |
| LGR5      | 1818.8912  | -1.1389743 | 0.76046295 | -1.497738  | 0.13420133 | 0.3018422  | 0.52022005 | no  |
| TMEM176B  | 19200.2275 | -1.1672661 | 0.4409675  | -2.647057  | 0.00811957 | 0.06257329 | 1.203611   | yes |
| SSR4      | 10887.252  | -1.2241086 | 0.61043132 | -2.0053175 | 0.04492911 | 0.15874684 | 0.7992949  | no  |
| C1QC      | 4069.13535 | -1.2400276 | 0.55975488 | -2.2153046 | 0.02673916 | 0.12457024 | 0.90458571 | no  |
| SELENOP   | 34314.8266 | -1.2435086 | 0.51776171 | -2.4017006 | 0.01631906 | 0.09101013 | 1.04091027 | yes |
| INAVA     | 4294.78486 | -1.2559343 | 0.59033848 | -2.1274817 | 0.03338008 | 0.13773601 | 0.86095251 | no  |
| REG4      | 15966.2714 | -1.3432509 | 0.97524079 | -1.3773531 | 0.1684031  | 0.348835   | 0.45737994 | no  |
| TNFRSF17  | 2792.8458  | -1.3586279 | 0.61541533 | -2.2076601 | 0.02726798 | 0.12457024 | 0.90458571 | no  |
| MSA48     | 1287.98924 | -1.3637374 | 0.63025459 | -2.1637881 | 0.03048062 | 0.12810694 | 0.89242734 | no  |
| TNFRSF11A | 7263.14539 | -1.4018091 | 0.60910519 | -2.3014236 | 0.0213677  | 0.10502768 | 0.97869622 | no  |
| OLFM4     | 25435.528  | -1.4177527 | 0.88830737 | -1.5960159 | 0.11048524 | 0.27861496 | 0.55499557 | no  |
| NO52      | 4415.26132 | -1.4378824 | 0.6009771  | -2.3925744 | 0.01673064 | 0.091545   | 1.03836537 | yes |
| CA7       | 1298.27157 | -1.4865783 | 0.75985711 | -1.9563918 | 0.05041901 | 0.17201781 | 0.7644266  | no  |
| SOX9      | 4574.56688 | -1.5105352 | 0.66764838 | -2.2624711 | 0.02366831 | 0.11252149 | 0.94876452 | no  |
| MYH11     | 20743.4326 | -1.5204588 | 0.75223562 | -2.0212534 | 0.04325355 | 0.15657365 | 0.80528132 | no  |
| OTOP2     | 738.768648 | -1.528389  | 0.92993831 | -1.6435381 | 0.10027165 | 0.27510757 | 0.56049745 | no  |
| CXCL14    | 8732.76611 | -1.5309708 | 0.66100733 | -2.3161177 | 0.02055184 | 0.10275922 | 0.98817918 | no  |
| CEACAM1   | 21259.322  | -1.6170256 | 0.70494001 | -2.2938485 | 0.0217992  | 0.10536281 | 0.97731265 | no  |
| CEACAM6   | 23845.8847 | -1.6680934 | 0.70067926 | -2.3806804 | 0.0172807  | 0.09280374 | 1.03243453 | yes |
| MUC1      | 8206.29814 | -1.7108829 | 0.52490528 | -3.2594127 | 0.00111643 | 0.02363953 | 1.62636116 | yes |
| KRT8      | 97907.0904 | -1.7241713 | 0.58818072 | -2.9313632 | 0.00337478 | 0.03624763 | 1.44072037 | yes |
| S100A16   | 8527.96765 | -1.7641203 | 0.63524246 | -2.7770818 | 0.00548494 | 0.0513107  | 1.28979208 | yes |
| ITM2C     | 59915.0621 | -1.8161916 | 0.56167577 | -3.2335231 | 0.00122273 | 0.02363953 | 1.62636116 | yes |
| S100P     | 5597.95965 | -1.8902844 | 0.86298947 | -2.1903911 | 0.02849589 | 0.12520291 | 0.90236374 | no  |
| DDC       | 5190.05703 | -1.894338  | 0.6678015  | -2.8366783 | 0.00455855 | 0.04558552 | 1.34117306 | yes |
| ADAMDEC1  | 10264.2272 | -1.9346004 | 0.57903053 | -3.3411025 | 0.00083446 | 0.02363953 | 1.62636116 | yes |
| FABP2     | 5896.1976  | -2.0219118 | 0.80813417 | -2.5019507 | 0.01235111 | 0.076209   | 1.11799376 | yes |
| TFF3      | 10832.0483 | -2.022793  | 0.70427139 | -2.8721783 | 0.00407653 | 0.0422212  | 1.37446948 | yes |
| PIGR      | 117128.085 | -2.0292558 | 0.75601726 | -2.6841395 | 0.00727168 | 0.05857739 | 1.23226999 | yes |
| AGR2      | 47284.3389 | -2.0361977 | 0.81159554 | -2.5088823 | 0.01211138 | 0.076209   | 1.11799376 | yes |
| EPCAM     | 57971.1687 | -2.1039525 | 0.70352997 | -2.9905655 | 0.00278461 | 0.03562572 | 1.4482364  | yes |
| SPINK1    | 10616.1579 | -2.1851581 | 0.61445418 | -3.5562588 | 0.00037617 | 0.01709684 | 1.76708418 | yes |
| LEFTY1    | 3988.95609 | -2.2570835 | 0.86228618 | -2.6175574 | 0.00885616 | 0.06264113 | 1.20314041 | yes |
| C15orf48  | 26739.1836 | -2.4489055 | 0.67213804 | -3.6434563 | 0.000269   | 0.01709684 | 1.76708418 | yes |
| MUC2      | 12916.4213 | -2.4902386 | 0.92305577 | -2.6978203 | 0.00697951 | 0.05783023 | 1.23784507 | yes |
| WFDCC2    | 1460.19394 | -2.4986149 | 0.85141237 | -2.9346706 | 0.00333902 | 0.03624763 | 1.44072037 | yes |
| SPINK4    | 10731.9425 | -2.6137551 | 1.01448594 | -2.5764331 | 0.00998255 | 0.06892715 | 1.16160966 | yes |
| LYPD8     | 8786.16714 | -2.6434257 | 0.86153923 | -3.0682593 | 0.0021531  | 0.03286306 | 1.48329199 | yes |
| SLC26A2   | 20711.8808 | -2.6730985 | 0.82422152 | -3.2431797 | 0.00118204 | 0.02363953 | 1.62636116 | yes |
| GPR15     | 3900.81575 | -2.6848083 | 0.75945183 | -3.5351923 | 0.00040748 | 0.01709684 | 1.76708418 | yes |
| ITLN1     | 13676.6227 | -2.8477454 | 0.90704111 | -3.139599  | 0.00169179 | 0.02725666 | 1.56452743 | yes |
| LGALS4    | 94777.0134 | -2.9341603 | 0.83920226 | -3.4963685 | 0.00047164 | 0.01709684 | 1.76708418 | yes |
| PHGR1     | 74019.8639 | -3.0317675 | 0.81278179 | -3.7301125 | 0.00019139 | 0.01709684 | 1.76708418 | yes |
| GUCY2A    | 1260.16858 | -3.1077626 | 0.93260398 | -3.3323498 | 0.00086116 | 0.02363953 | 1.62636116 | yes |
| FABP1     | 63313.6438 | -3.3477142 | 0.90835847 | -3.6854549 | 0.00022829 | 0.01709684 | 1.76708418 | yes |
| CA4       | 10499.4036 | -3.5330824 | 0.93494966 | -3.7789012 | 0.00015752 | 0.01709684 | 1.76708418 | yes |
| AQP8      | 10362.8134 | -3.6448886 | 1.15982052 | -3.1426316 | 0.00167436 | 0.02725666 | 1.56452743 | yes |

Supplementary Table 6. Pseudobulk DE gene analysis of Xenium data comparing colon biopsies in UC PRE Non-Responders versus UC PRE Responders. Significance was set as log2fc >0.4 or <-0.4, p-adj < 0.1 and baseMean >500.



| Gene Signature | Gene list       | Numeric ID     |         |
|----------------|-----------------|----------------|---------|
| Xenium_HC      | <i>AQP8</i>     | 7994252        |         |
|                | <i>GUCA2A</i>   | 7915404        |         |
|                | <i>SLC26A2</i>  | 8109194        |         |
|                | <i>BEST4</i>    | 7915598        |         |
|                | <i>OTOP2</i>    | 8009705        |         |
|                | <i>DDC</i>      | 8139640        |         |
|                | <i>MT1G</i>     | 8001531        |         |
|                | <i>CA7</i>      | 7996331        |         |
|                | <i>TRPM5</i>    | 7945742        |         |
|                | <i>FABP1</i>    | 8053654        |         |
|                | <i>JUN</i>      | 7916609        |         |
|                | <i>FABP2</i>    | 8102523        |         |
|                | <i>CLDN5</i>    | 8074473        |         |
|                | <i>LGALS4</i>   | 8036591        |         |
|                | <i>PIGR</i>     | 7923929        |         |
|                | <i>TREM2</i>    | 8126279        |         |
|                | <i>DUSP1</i>    | 8115831        |         |
|                | <i>C15ORF48</i> | 7983478        |         |
|                | <i>MS4A8</i>    | 7940323        |         |
|                | <i>EPCAM</i>    | 8041853        |         |
|                | <i>IL32</i>     | 7992828        |         |
|                | <i>C7</i>       | 8105084        |         |
|                | <i>KRT8</i>     | 7963567        |         |
|                | <i>PHLDA2</i>   | 7945781        |         |
|                | <i>NTRK2</i>    | 8156134        |         |
|                | <i>CACNA1A</i>  | 8034643        |         |
|                | <i>PLP1</i>     | 8169061        |         |
|                | <i>GATA2</i>    | 8090469        |         |
|                | <i>TRGV9</i>    | 8139107        |         |
|                | <i>CEACAM1</i>  | 8037205        |         |
|                | <i>HPGDS</i>    | 8101780        |         |
|                | <i>CD8B</i>     | 8044154        |         |
|                | <i>RORC</i>     | 7920082        |         |
|                | <i>NCAM1</i>    | 7943892        |         |
|                | <i>CCL23</i>    | 8014361        |         |
|                | <i>MGLL</i>     | 8090433        |         |
|                | <i>CLEC9A</i>   | 7953924        |         |
|                | <i>IL10</i>     | 7923907        |         |
|                | <i>FCER1A</i>   | 7906443        |         |
|                | <i>TINAGL1</i>  | 7899627        |         |
|                | <i>TPH1</i>     | 7946946        |         |
|                | <i>INAVA</i>    | 7908639        |         |
|                | <i>CCL8</i>     | 8006453        |         |
|                | <i>CSPG4</i>    | 7990545        |         |
|                | <i>TNFSF9</i>   | 8025053        |         |
|                | <i>ADGRB3</i>   | 8120468        |         |
|                | <i>FABP5</i>    | 7948420        |         |
|                | <i>GLIS3</i>    | 8159900        |         |
|                | <i>CCSER1</i>   | 8096425        |         |
|                | <i>TRGC1</i>    | 8180366        |         |
|                | <i>SOX6</i>     | 7946757        |         |
|                | <i>KLRC2</i>    | 7961182        |         |
|                | <i>NUPR1</i>    | 8000574        |         |
|                | <i>LILRA4</i>   | 8039246        |         |
|                | <i>CST3</i>     | 8065403        |         |
|                | <i>TRGC2</i>    | 8180366        |         |
|                | <i>MS4A2</i>    | 7940226        |         |
|                | <i>IL1RL1</i>   | 8044021        |         |
|                | <i>HMG2</i>     | 7899187        |         |
|                | <i>S100B</i>    | 8071036        |         |
|                | Xenium_UC_PRE   | <i>S100A12</i> | 7920238 |
|                |                 | <i>LTB</i>     | 8124950 |
|                |                 | <i>SELL</i>    | 7896687 |
|                |                 | <i>PTGDS</i>   | 8159521 |
|                |                 | <i>JAK3</i>    | 8035351 |
|                |                 | <i>MZB1</i>    | 8114511 |
|                |                 | <i>BANK1</i>   | 8096617 |
|                |                 | <i>CD19</i>    | 7994487 |
|                |                 | <i>C3</i>      | 8033257 |
| <i>CD79A</i>   |                 | 8029136        |         |
| <i>TIMP1</i>   |                 | 8167185        |         |
| <i>S100A9</i>  |                 | 7905571        |         |
| <i>MS4A1</i>   |                 | 7940287        |         |
| <i>S100A8</i>  |                 | 7920244        |         |
| <i>NOS2</i>    |                 | 8013536        |         |
| <i>PTPRC</i>   |                 | 7908553        |         |
| <i>SSR4</i>    |                 | 8170775        |         |
| <i>CLU</i>     |                 | 8149927        |         |
| <i>PECAM1</i>  |                 | 8017599        |         |
| <i>COL1A1</i>  |                 | 8016646        |         |
| <i>BASP1</i>   |                 | 8104601        |         |
| <i>IL7R</i>    |                 | 8104901        |         |
| <i>MRC1</i>    |                 | 7926410        |         |

|                 |                 |         |
|-----------------|-----------------|---------|
|                 | <i>ALOX5</i>    | 7927215 |
|                 | <i>TCF4</i>     | 8023415 |
|                 | <i>SERPINF1</i> | 8003667 |
|                 | <i>CD1D</i>     | 7906330 |
|                 | <i>VWF</i>      | 7960464 |
|                 | <i>CD44</i>     | 7939341 |
|                 | <i>OSMR</i>     | 8105040 |
|                 | <i>MEF2C</i>    | 7896727 |
|                 | <i>REG1A</i>    | 8042986 |
|                 | <i>OLFM4</i>    | 7969288 |
|                 | <i>KRT20</i>    | 8015124 |
|                 | <i>LCN2</i>     | 8158167 |
|                 | <i>S100A6</i>   | 7920258 |
|                 | <i>MALAT1</i>   | 7941272 |
|                 | <i>AGR2</i>     | 8138381 |
|                 | <i>B2M</i>      | 7983360 |
|                 | <i>CEACAM6</i>  | 8029098 |
|                 | <i>S100A10</i>  | 7920123 |
|                 | <i>ANXA2</i>    | 7989335 |
|                 | <i>COL3A1</i>   | 8046922 |
|                 | <i>TIMP1</i>    | 8167185 |
|                 | <i>PLAC8</i>    | 8101429 |
|                 | <i>COL1A1</i>   | 8016646 |
|                 | <i>XBP1</i>     | 8075182 |
|                 | <i>LGALS3</i>   | 7974461 |
|                 | <i>DMBT1</i>    | 7931108 |
|                 | <i>SOD2</i>     | 8130556 |
|                 | <i>MZB1</i>     | 8114511 |
|                 | <i>CD63</i>     | 7963911 |
|                 | <i>SH3BGRL3</i> | 7899153 |
|                 | <i>PFN1</i>     | 8011759 |
|                 | <i>SELENOP</i>  | 8111915 |
|                 | <i>EZR</i>      | 8130505 |
| CosMx_UC_PRE    | <i>MYL12A</i>   | 8019924 |
|                 | <i>HSP90B1</i>  | 7958130 |
|                 | <i>ENO1</i>     | 7912198 |
|                 | <i>CSTB</i>     | 8070701 |
|                 | <i>LYZ</i>      | 7957023 |
|                 | <i>SOD1</i>     | 8068168 |
|                 | <i>SERPINA1</i> | 7981068 |
|                 | <i>TPT1</i>     | 7971373 |
|                 | <i>FAU</i>      | 7893603 |
|                 | <i>IGFBP7</i>   | 8100541 |
|                 | <i>ANXA4</i>    | 8042468 |
|                 | <i>VIM</i>      | 7926368 |
|                 | <i>COL1A2</i>   | 8134263 |
|                 | <i>ARF1</i>     | 7892830 |
|                 | <i>PSAP</i>     | 7934196 |
|                 | <i>PGK1</i>     | 8168500 |
|                 | <i>CALM3</i>    | 8029831 |
|                 | <i>GSTP1</i>    | 7941936 |
|                 | <i>CALM1</i>    | 8052010 |
|                 | <i>CTNNB1</i>   | 8079021 |
|                 | <i>COL6A3</i>   | 8059905 |
|                 | <i>ITM2B</i>    | 7969003 |
|                 | <i>SRGN</i>     | 7927964 |
|                 | <i>RACK1</i>    | 8116520 |
|                 | <i>ATP5F1E</i>  | 8067288 |
|                 | <i>RBM47</i>    | 8099967 |
|                 | <i>IRF4</i>     | 8116559 |
|                 | <i>AQP8</i>     | 7994252 |
|                 | <i>CA4</i>      | 8008900 |
|                 | <i>FABP1</i>    | 8053654 |
|                 | <i>GUCA2A</i>   | 7915404 |
|                 | <i>LGALS4</i>   | 8036591 |
|                 | <i>ITLN1</i>    | 7921690 |
|                 | <i>GPR15</i>    | 8081214 |
|                 | <i>SLC26A2</i>  | 8109194 |
|                 | <i>SPINK4</i>   | 8154779 |
|                 | <i>WFDC2</i>    | 8063000 |
|                 | <i>MUC2</i>     | 7937560 |
|                 | <i>C15orf48</i> | 7983478 |
|                 | <i>LEFTY1</i>   | 7924663 |
|                 | <i>SPINK1</i>   | 8114964 |
|                 | <i>EPCAM</i>    | 8041853 |
| Xenium UC PRE R | <i>AGR2</i>     | 8138381 |
|                 | <i>PIGR</i>     | 7923929 |
|                 | <i>TFF3</i>     | 8070567 |
|                 | <i>FABP2</i>    | 8102523 |
|                 | <i>ADAMDEC1</i> | 8145317 |
|                 | <i>DDC</i>      | 8139640 |
|                 | <i>ITM2C</i>    | 8048995 |
|                 | <i>S100A16</i>  | 7920291 |
|                 | <i>KRT8</i>     | 7963567 |

|                                |                  |         |
|--------------------------------|------------------|---------|
|                                | <i>MUC1</i>      | 7920642 |
|                                | <i>CEACAM6</i>   | 8029098 |
|                                | <i>NOS2</i>      | 8013536 |
|                                | <i>SELENOP</i>   | 8111915 |
|                                | <i>TMEM176B</i>  | 8143790 |
|                                | <i>CST3</i>      | 8065403 |
|                                | <i>TMEM176A</i>  | 8137264 |
|                                | <i>NUPR1</i>     | 8000574 |
|                                | <i>CD1C</i>      | 7906348 |
|                                | <i>ZBTB16</i>    | 7943984 |
|                                | <i>SELL</i>      | 7896687 |
|                                | <i>FCER2</i>     | 8033420 |
|                                | <i>CXCR5</i>     | 7944335 |
|                                | <i>CCR7</i>      | 8015031 |
|                                | <i>CD19</i>      | 7994487 |
|                                | <i>BANK1</i>     | 8096617 |
|                                | <i>MS4A1</i>     | 7940287 |
|                                | <i>MMP3</i>      | 7951284 |
| Xenium UC PRE NR               | <i>MMP1</i>      | 7951271 |
|                                | <i>CCR6</i>      | 8123364 |
|                                | <i>CD69</i>      | 7896693 |
|                                | <i>S1PR1</i>     | 7903393 |
|                                | <i>ALOX5AP</i>   | 7968344 |
|                                | <i>ICOS</i>      | 8047702 |
|                                | <i>IL3RA</i>     | 8165752 |
|                                | <i>CD7</i>       | 8019478 |
|                                | <i>ITGAX</i>     | 7995128 |
|                                | <i>ABCC9</i>     | 7961710 |
|                                | <i>KLF2</i>      | 8026564 |
|                                | <i>IL18R1</i>    | 8044035 |
|                                | <i>CD19</i>      | 7994487 |
|                                | <i>MS4A1</i>     | 7940287 |
|                                | <i>BANK1</i>     | 8096617 |
|                                | <i>SELL</i>      | 7896687 |
|                                | <i>CD79A</i>     | 8029136 |
|                                | <i>CCR7</i>      | 8015031 |
|                                | <i>LTB</i>       | 8124950 |
|                                | <i>C3</i>        | 8033257 |
|                                | <i>TNFSF13B</i>  | 7969986 |
|                                | <i>IRF8</i>      | 7997712 |
|                                | <i>PTGDS</i>     | 8159521 |
|                                | <i>CD1C</i>      | 7906348 |
| Xenium GALT B DC S4_fibroblast | <i>HLA-DRA</i>   | 8118548 |
|                                | <i>CD86</i>      | 7896700 |
|                                | <i>ITGAX</i>     | 7995128 |
|                                | <i>FCER1A</i>    | 7906443 |
|                                | <i>CLEC10A</i>   | 8012013 |
|                                | <i>CD1D</i>      | 7906330 |
|                                | <i>CLEC9A</i>    | 7953924 |
|                                | <i>XCR1</i>      | 8086595 |
|                                | <i>FLT3</i>      | 7970737 |
|                                | <i>HLA-DRB1</i>  | 8125445 |
|                                | <i>CD40</i>      | 8063156 |
|                                | <i>CD209</i>     | 8033445 |
|                                | <i>LAMP3</i>     | 7893231 |
|                                | <i>IL1R1</i>     | 8043995 |
|                                | <i>TIMP1</i>     | 8167185 |
|                                | <i>CD44</i>      | 7939341 |
|                                | <i>IL13RA2</i>   | 8174598 |
|                                | <i>MMP1</i>      | 7951271 |
|                                | <i>MMP3</i>      | 7951284 |
|                                | <i>OSMR</i>      | 8105040 |
|                                | <i>NFKBIA</i>    | 7978644 |
|                                | <i>TNFAIP3</i>   | 8122265 |
|                                | <i>TNFRSF11B</i> | 8152512 |
|                                | <i>S100A8</i>    | 7920244 |
| Xenium IAF-Monocyte-Neutrophil | <i>S100A9</i>    | 7905571 |
|                                | <i>FCGR3B</i>    | 7921873 |
|                                | <i>CSF3R</i>     | 7914950 |
|                                | <i>BASP1</i>     | 8104601 |
|                                | <i>OSM</i>       | 8075316 |
|                                | <i>VCAN</i>      | 8106743 |
|                                | <i>LYZ</i>       | 7957023 |
|                                | <i>FCN1</i>      | 8165011 |
|                                | <i>CST3</i>      | 8065403 |
|                                | <i>CD14</i>      | 8114612 |
|                                | <i>HLA-DRA</i>   | 8118548 |
|                                | <i>HLA-DRB1</i>  | 8125445 |
|                                | <i>TREM1</i>     | 8126303 |

**Supplementary Table 7.** iSCST gene signatures used for Gene Set Enrichment Analysis (GSEA). Numeric ID, Affymetrix numeric probe identifier corresponding to each gene.
